# Supplementary material for: Structure–property relationship of p -alkoxyazobenzenes as molecular solar thermal phase change material energy storage systems (MOST-PCM)
Source: Royal Society of Chemistry journal article supplement (doi:10.1039/d5tc01024a), 2025-01-01
Supplement: d5tc01024a1.pdf [file d5tc01024a1.pdf]

## Supporting Information - Structure Property Relationship of *p*-Alkoxy-Azobenzenes as Molecular Solar Thermal Phase Change Material Energy Storage Systems (MOST-PCM)

### Table of contents

|                                                                    |    |
|--------------------------------------------------------------------|----|
| 1. General information .....                                       | 1  |
| 2. Synthesis .....                                                 | 2  |
| 3. NMR spectra .....                                               | 6  |
| 4. Melting Points .....                                            | 13 |
| 5. Irradiation experiments .....                                   | 13 |
| 6. UV-Vis spectroscopy .....                                       | 16 |
| 7. Half-life in solution <i>via</i> UV-Vis spectroscopy .....      | 18 |
| 8. Determination of PSS in solution and neat <i>via</i> HPLC ..... | 20 |
| 9. Neat half-life <i>via</i> HPLC and UV-Vis spectroscopy .....    | 26 |
| 10. Photoliquefaction <i>via</i> HPLC and PXRD .....               | 31 |
| 11. DSC measurments .....                                          | 34 |
| 12. References.....                                                | 38 |

### 1. General information

Chemicals were used as purchased from Sigma-Aldrich, Acros Organics, Alfa Aesar, TCI Europe or BLD Pharm. Anhydrous solvents were purchased from Acros Organics. Technical grade solvents for workup and purification were distilled prior to use. Air and/or water-sensitive reactions were carried out under Schlenk-conditions or in a nitrogen-filled glovebox. Solids were dried under high vacuum (oil pump, ca  $10^{-3}$  mbar) at room temperature (rt), 50 °C or 60 °C if necessary.

Flash column chromatography and column chromatography was carried out with Silica 60 M (0.04 – 0.063 mm) from Macherey Nagel GmbH & Co. KG. Thin layer chromatography was performed on Polygram® SIL G/UV254 from Macherey Nagel GmbH & Co. KG.

NMR spectra were measured on a Bruker Avance II 200 MHz, Avance II 400 MHz or Avance III 400 MHz HD spectrometer at rt, if not stated otherwise. Chemical shifts are reported in parts per million (ppm) relative to the solvent peak, coupling constants (J) are reported in Hertz (Hz). Deuterated solvents were obtained from Deutero GmbH (Kastellaun, Germany) or Euriso-Top GmbH.

Melting points were determined on a M5000 melting point meter from A.KRÜSS Optronic GmbH Germany. A heating rate of 1 °C min<sup>-1</sup>, a resolution of 0.1 °C and a measurement accuracy of ± 0.3 °C (25–200 °C) or ± 0,5 °C (200–400 °C) apply for this device

For all azobenzenes, the thermodynamically more stable (*E*)-isomer is reported if not stated otherwise. ESI-MS spectra were recorded on a Bruker Daltonics Micro TOF. Melting points

were measured on a Krüss M5000 capillary melting point meter with a heating rate of 1 °C min<sup>-1</sup>.

## 2. Synthesis

### Synthesis of 4-Hydroxyazobenzene (2)

Aniline (30.0 mmol, 2.74 mL, 1.00 eq.) was added to an aqueous solution containing H<sub>2</sub>O (60 mL) and 37% HCl<sub>(aq)</sub> (15 mL) to prepare an aniline solution, which was added dropwise into an aqueous solution containing NaNO<sub>2</sub> (39.0 mmol, 2.69 g, 1.30 eq.) in H<sub>2</sub>O (15 mL) cooled in an ice water bath (0 °C) under strong stirring. After mixing, the resulting solution was stirred for 1 h at 0 °C to form a diazonium salt solution. Then, a separated aqueous solution containing phenol (30.0 mmol, 2.67 mL, 1.00 eq.) and NaOH (12.1 g, 300 mmol, 10.0 eq.) in H<sub>2</sub>O (60 mL) was prepared, and the diazonium salt solution was added to the phenol solution slowly with cooling by an ice water bath. The color of the solution became dark during this process. After stirring at 0 °C for 1 h, the resulting solution was acidified by adding 20% HCl<sub>(aq)</sub> solution. Afterwards, the resulting solution was filtered by suction filtration to collect the dark solid which was washed by water, dissolved in acetone and reprecipitated by adding water slowly. Vacuum filtration afforded a brown powder as product with about 90% yield. The brown powder was further purified by column chromatography (silica, toluene / ethylacetate = 7 : 1) to obtain a brown solid (4.81 g, 81%).

<sup>1</sup>H NMR (400 MHz, CDCl<sub>3</sub>) δ 7.98 – 7.86 (m, 4H), 7.54 – 7.48 (m, 2H), 7.47 – 7.42 (m, 1H), 7.03 – 6.94 (m, 2H).

Analytical data corresponds to literature.<sup>1</sup>

### Synthesis of *p*-OBu-Azobenzene (3a)

A mixture of 4-hydroxyazobenzene (404 mg, 2.04 mmol, 1.00 eq.) and K<sub>2</sub>CO<sub>3</sub> (1.11 g, 8.02 mmol, 3.97 eq.) in acetone (100 mL) was dissolved in a 250 mL flask while stirring. To this solution the 1-bromobutane (0.87 mL, 8.13 mmol, 3.99 eq.) was added and stirred for 3 days at 70 °C. The solution turned yellow. After cooling the solution to rt, K<sub>2</sub>CO<sub>3</sub> was removed by filtration, and the solvents were removed under *vacuo* to obtain the yellowish crude product. The product was purified by column chromatography (silica gel 50 g, toluene: cyclohexane = 1: 5) to obtain an orange solid (479 mg, 96%).

<sup>1</sup>H-NMR (400 MHz, CDCl<sub>3</sub>) δ = 7.99 – 7.92 (m, 2H), 7.93 – 7.84 (m, 2H), 7.54 – 7.47 (m, 2H), 7.47 – 7.40 (m, 1H), 7.04 – 6.98 (m, 2H), 4.06 (t, *J* = 6.5 Hz, 2H), 1.87 – 1.76 (m, 2H), 1.59 – 1.46 (m, 2H), 1.00 (t, *J* = 7.4 Hz, 3H).

Melting point: 64.3 °C

Analytical data corresponds to literature.<sup>2</sup>

### Synthesis of *p*-OPen-Azobenzene (3b)

A mixture of 4-hydroxyazobenzene (402 mg, 2.03 mmol, 1.00 eq.) and K<sub>2</sub>CO<sub>3</sub> (1.11 g, 8.06 mmol, 3.98 eq.) in acetone (100 mL) were dissolved in a 250 mL flask while stirring. To this solution the 1-bromopentane (0.52 mL, 4.08 mmol, 2.01 eq.) was added and stirred for 3 days at 70 °C. The color of solution was changed to yellow. After cooling the solution to rt, K<sub>2</sub>CO<sub>3</sub> was removed by filtration, and the solvents were removed under *vacuo* to obtain the yellowish crude product. The product was purified by column chromatography (silica gel 50 g, toluene / cyclohexane = 1 : 5) affording an orange solid (503 mg, 98%).

<sup>1</sup>H NMR (400 MHz, CDCl<sub>3</sub>) δ 7.97 – 7.91 (m, 2H), 7.89 (dd, *J* = 7.4, 1.8 Hz, 2H), 7.50 (dd, *J* = 8.4, 6.6 Hz, 2H), 7.46 – 7.41 (m, 1H), 7.05 – 6.98 (m, 2H), 4.05 (t, *J* = 6.6 Hz, 2H), 1.89 – 1.78 (m, 2H), 1.52 – 1.36 (m, 4H), 0.95 (t, *J* = 7.0 Hz, 3H).

Melting point: 60.0 °C

Analytical data corresponds to literature.<sup>3</sup>

### Synthesis of *p*-OHex-Azobenzene (3c)

A mixture of 4-hydroxyazobenzene (402 mg, 2.03 mmol, 1.00 eq.) and K<sub>2</sub>CO<sub>3</sub> (1.21 g, 8.74 mmol, 4.31 eq.) in acetone (100 mL) was dissolved in a 250 mL flask while stirring. To this solution the 1-bromohexane (1.20 mL, 8.58 mmol, 4.23 eq.) was added and stirred for 3 days at 70 °C. The color of solution was changed to yellow. After cooling the solution to rt, K<sub>2</sub>CO<sub>3</sub> was removed by filtration, and the solvents were removed under *vacuo* to obtain the yellowish crude product. The product was purified by column chromatography (silica gel 50 g, toluene / cyclohexane = 1 : 5) to obtain an orange solid (540 mg, 99%).

<sup>1</sup>H NMR (400 MHz, CDCl<sub>3</sub>) δ 7.98 – 7.92 (m, 2H), 7.92 – 7.87 (m, 2H), 7.50 (dd, *J* = 8.4, 6.5 Hz, 2H), 7.47 – 7.40 (m, 1H), 7.07 – 6.97 (m, 2H), 4.05 (t, *J* = 6.6 Hz, 2H), 1.82 (dt, *J* = 14.7, 6.7 Hz, 2H), 1.49 (dtd, *J* = 14.9, 7.2, 4.5 Hz, 2H), 1.36 (h, *J* = 3.7 Hz, 4H), 0.98 – 0.88 (m, 3H).

Melting point: 57.3 °C

Analytical data corresponds to literature.<sup>4</sup>

### Synthesis of *p*-OHep-Azobenzene (3d)

A mixture of 4-hydroxyazobenzene (403 mg, 2.03 mmol, 1.00 eq.) and K<sub>2</sub>CO<sub>3</sub> (1.13 g, 8.14 mmol, 4.01 eq.) in acetone (100 mL) was dissolved in a 250 mL flask while stirring. To this solution the 1-bromoheptane (1.30 mL, 8.19 mmol, 4.03 eq.) was added and stirred for 3 days at 70 °C. The color of solution was changed to yellow. After cooling the solution to rt, K<sub>2</sub>CO<sub>3</sub> was removed by filtration, and the solvents were removed under *vacuo* to obtain the yellowish crude product. The product was purified by column chromatography (silica gel 50 g, toluene / cyclohexane = 1 : 4) to obtain an orange solid (491 mg, 86%).

$^1\text{H}$  NMR (400 MHz,  $\text{CDCl}_3$ )  $\delta$  7.96 – 7.90 (m, 2H), 7.90 – 7.84 (m, 2H), 7.56 – 7.47 (m, 2H), 7.47 – 7.38 (m, 1H), 7.05 – 6.96 (m, 2H), 4.04 (t,  $J$  = 6.6 Hz, 2H), 1.88 – 1.75 (m, 2H), 1.54 – 1.43 (m, 2H), 1.43 – 1.27 (m, 6H), 0.96 – 0.87 (m, 3H).  $^{13}\text{C}$  NMR (101 MHz,  $\text{CDCl}_3$ )  $\delta$  161.99, 152.80, 146.90, 130.48, 129.18, 125.03, 122.68, 114.88, 68.55, 31.93, 29.35, 29.21, 26.13, 22.76, 14.24.

HRMS (ESI):  $m/z$  for  $\text{C}_{19}\text{H}_{25}\text{N}_2\text{O}^+$ ; calcd 297.1962, found 297.1963

Melting point: 71.0 °C

### Synthesis of *p*-OOct-Azobenzene (3e)

A mixture of 4-hydroxyazobenzene (408 mg, 2.06 mmol, 1.00 eq.) and  $\text{K}_2\text{CO}_3$  (1.11 g, 8.00 mmol, 3.88 eq.) in acetone (100 mL) was dissolved in a 250 mL flask while stirring. To this solution the 1-bromooctane (1.40 mL, 8.05 mmol, 3.91 eq.) was added and stirred for 3 days at 70 °C. The color of solution was changed to yellow. After cooling the solution to rt,  $\text{K}_2\text{CO}_3$  was removed by filtration, and the solvents were removed under *vacuo* to obtain the yellowish crude product. The product was purified by column chromatography (silica gel 50 g/ toluene: cyclohexane = 1 : 4) to obtain an orange solid (580 mg, 95%).

$^1\text{H}$  NMR (400 MHz,  $\text{CDCl}_3$ )  $\delta$  7.99 – 7.91 (m, 2H), 7.91 – 7.85 (m, 2H), 7.56 – 7.47 (m, 2H), 7.46 – 7.41 (m, 1H), 7.04 – 6.97 (m, 2H), 4.04 (t,  $J$  = 6.6 Hz, 2H), 1.88 – 1.77 (m, 3H), 1.54 – 1.43 (m, 2H), 1.43 – 1.22 (m, 8H), 0.94 – 0.85 (m, 3H).

Melting point: 72.1 °C

Analytical data corresponds to literature.<sup>5</sup>

### Synthesis of *p*-ONon-Azobenzene (3f)

A mixture of 4-hydroxyazobenzene (399 mg, 2.01 mmol, 1.00 eq.) and  $\text{K}_2\text{CO}_3$  (1.10 g, 7.92 mmol, 3.94 eq.) in acetone (100 mL) was dissolved in a 250 mL flask while stirring. To this solution the 1-bromononane (0.80 mL, 4.17 mmol, 2.07 eq.) was added and stirred for 3 days at 70 °C. The color of solution was changed to yellow. After cooling the solution to rt,  $\text{K}_2\text{CO}_3$  was removed by filtration, and the solvents were removed under *vacuo* to obtain the yellowish crude product. The product was purified by column chromatography (silica gel 50 g/ toluene: cyclohexane = 1 : 4) to obtain an orange solid (609 mg, 98%).

$^1\text{H}$  NMR (400 MHz,  $\text{CDCl}_3$ )  $\delta$  7.98 – 7.92 (m, 2H), 7.92 – 7.86 (m, 2H), 7.55 – 7.47 (m, 2H), 7.47 – 7.40 (m, 1H), 7.05 – 6.97 (m, 2H), 4.05 (t,  $J$  = 6.6 Hz, 2H), 1.82 (dt,  $J$  = 14.6, 6.7 Hz, 2H), 1.54 – 1.43 (m, 2H), 1.41 – 1.23 (m, 10H), 0.93 – 0.84 (m, 3H).  $^{13}\text{C}$  NMR (101 MHz,  $\text{CDCl}_3$ )  $\delta$  162.00, 152.78, 146.88, 130.48, 129.18, 125.04, 122.68, 114.88, 68.56, 32.03, 29.68, 29.54, 29.41, 29.34, 26.16, 22.83, 14.27.

HRMS (ESI):  $m/z$  for  $\text{C}_{21}\text{H}_{29}\text{N}_2\text{O}^+$ ; calcd 325.2275, found 325.2277

Melting point: 78.5 °C



### Synthesis of *p*-ODec-Azobenzene (3g)

A mixture of 4-hydroxyazobenzene (400 mg, 2.02 mmol, 1.00 eq.) and K<sub>2</sub>CO<sub>3</sub> (1.11 g, 8.05 mmol, 4.00 eq.) in acetone (100 mL) were dissolved in a 250 mL flask while stirring. To this solution the 1-bromodecane (1.10 mL, 5.32 mmol, 2.64 eq.) was added and stirred for 3 days at 70 °C. The color of solution changed to yellow. After cooling the solution to rt, K<sub>2</sub>CO<sub>3</sub> was removed by filtration, and the solvents were removed under *vacuo* to obtain the yellowish crude product. The product was purified by column chromatography (silica gel 50 g/ toluene: cyclohexane = 1 : 4) to obtain an orange solid (617 mg, 95%).

<sup>1</sup>H NMR (400 MHz, CDCl<sub>3</sub>) δ 7.98 – 7.90 (m, 2H), 7.91 – 7.84 (m, 2H), 7.54 – 7.47 (m, 2H), 7.47 – 7.40 (m, 1H), 7.05 – 6.96 (m, 2H), 4.04 (t, *J* = 6.6 Hz, 2H), 1.82 (dt, *J* = 14.6, 6.7 Hz, 2H), 1.55 – 1.43 (m, 2H), 1.43 – 1.20 (m, 13H), 0.93 – 0.84 (m, 3H).

Melting point: 63.0 °C

Analytical data corresponds to literature.<sup>6</sup>

### Synthesis of *p*-OUndec-Azobenzene (3h)

A mixture of 4-hydroxyazobenzene (202 mg, 1.02 mmol, 1.00 eq.) and K<sub>2</sub>CO<sub>3</sub> (601 mg, 4.35 mmol, 2.16 eq.) in acetone (100 mL) were dissolved in a 250 mL flask while stirring. To this solution the 1-bromoundecane (0.60 mL, 2.68 mmol, 1.33 eq.) was added and stirred for 3 days at 70 °C. The color of solution changed to yellow. After cooling the solution to rt, K<sub>2</sub>CO<sub>3</sub> was removed by filtration, and the solvents were removed under *vacuo* to obtain the yellowish crude product. The product was purified by column chromatography (silica gel 50 g/ toluene: cyclohexane = 1 : 4) to obtain an orange solid (615 mg, 87%).

<sup>1</sup>H NMR (400 MHz, CDCl<sub>3</sub>) δ 7.95 – 7.84 (m, 4H), 7.50 (dd, *J* = 8.2, 6.4 Hz, 2H), 7.47 – 7.39 (m, 1H), 7.00 (d, *J* = 8.5 Hz, 2H), 4.04 (t, *J* = 6.6 Hz, 2H), 1.92 – 1.76 (m, 2H), 1.54 – 1.42 (m, 2H), 1.42 – 1.22 (m, 15H), 0.93 – 0.85 (m, 3H). <sup>13</sup>C NMR (101 MHz, CDCl<sub>3</sub>) δ 161.92, 152.90, 146.97, 130.45, 129.17, 124.95, 122.71, 114.88, 68.54, 32.06, 29.88 – 29.63 (m), 29.51 (d, *J* = 4.5 Hz), 29.34, 26.16, 22.84, 14.27.

HRMS (ESI): *m/z* for C<sub>23</sub>H<sub>23</sub>N<sub>2</sub>O<sup>+</sup>; calcd 353.2588, found 353.2590

Melting point: 75.2 °C

### Synthesis of *p*-ODodec-Azobenzene (3i)

A mixture of 4-hydroxyazobenzene (409 mg, 2.06 mmol, 1.00 eq.) and K<sub>2</sub>CO<sub>3</sub> (1.14 g, 8.26 mmol, 4.11 eq.) in acetone (100 mL) were dissolved in a 250 mL flask while stirring. To this solution the 1-bromododecane (2.00 mL, 8.35 mmol, 4.15 eq.) was added and stirred for 3 days at 70 °C. The color of solution changed to yellow. After cooling the solution to rt, K<sub>2</sub>CO<sub>3</sub> was removed by filtration, and the solvents were removed under *vacuo* to obtain the yellowish

crude product. The product was purified by column chromatography (silica gel 50 g/ toluene: cyclohexane = 1 : 4) to obtain an orange solid (692 mg, 94%).

$^1\text{H}$  NMR (400 MHz,  $\text{CDCl}_3$ )  $\delta$  7.97 – 7.91 (m, 2H), 7.91 – 7.86 (m, 2H), 7.56 – 7.47 (m, 2H), 7.46 – 7.40 (m, 1H), 7.05 – 6.97 (m, 2H), 4.04 (t,  $J$  = 6.6 Hz, 2H), 1.82 (dt,  $J$  = 14.7, 6.7 Hz, 2H), 1.54 – 1.42 (m, 2H), 1.38 – 1.20 (m, 17H), 0.94 – 0.84 (m, 3H).

Melting point: 70.5 °C

Analytical data corresponds to literature.<sup>7</sup>

### 3. NMR spectra

#### $^1\text{H}$ -NMR of 4-Hydroxyazobenzene (2)

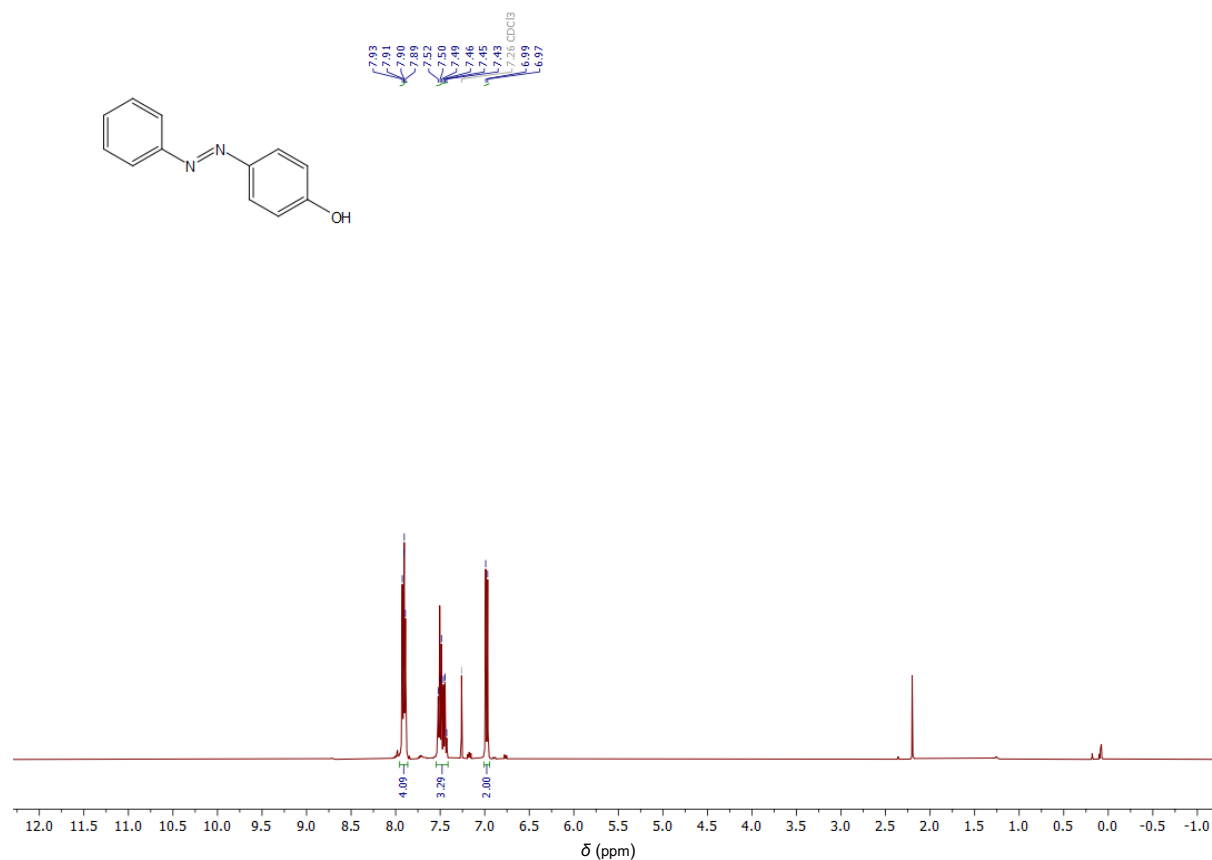

# <sup>1</sup>H-NMR of *p*-OBu-Azobenzene (3a)

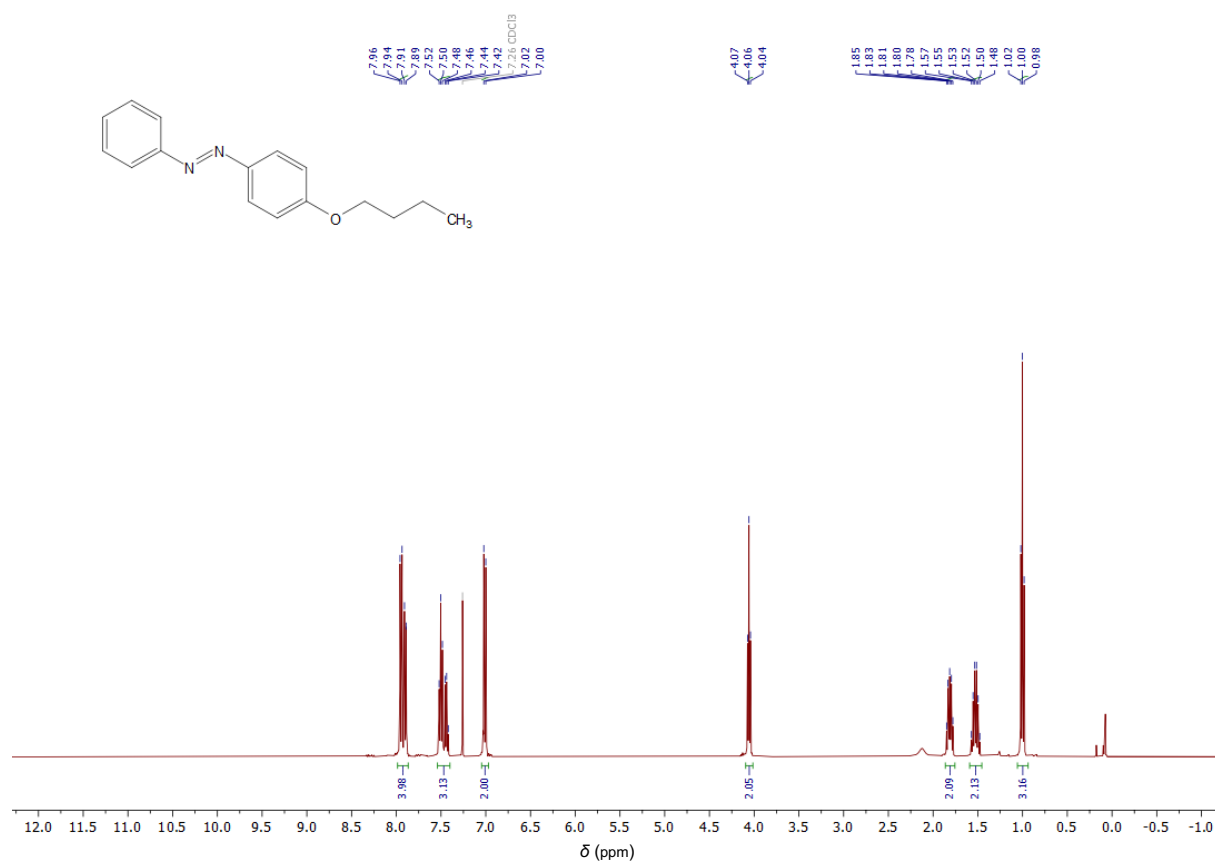

# <sup>1</sup>H-NMR of *p*-OPen-Azobenzene (3b)

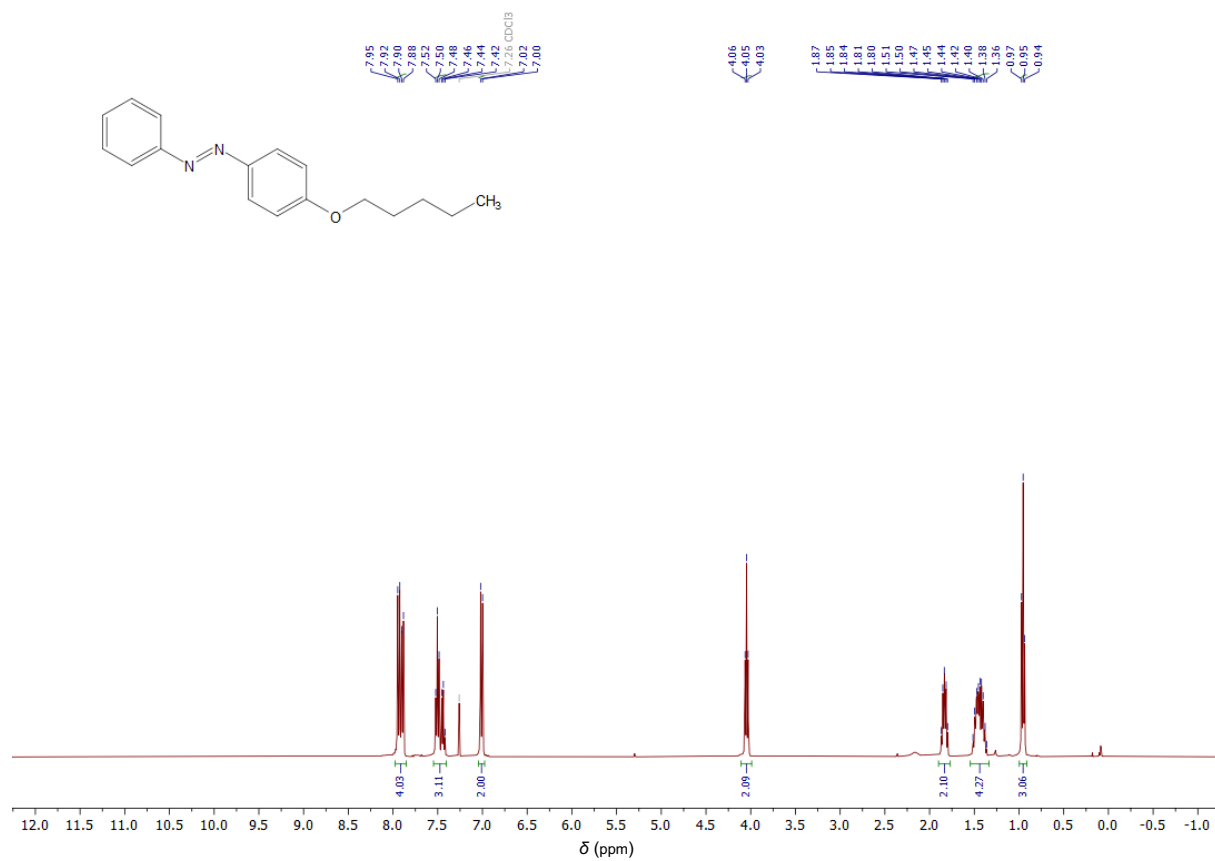

# <sup>1</sup>H-NMR of *p*-OHex-Azobenzene (3c)

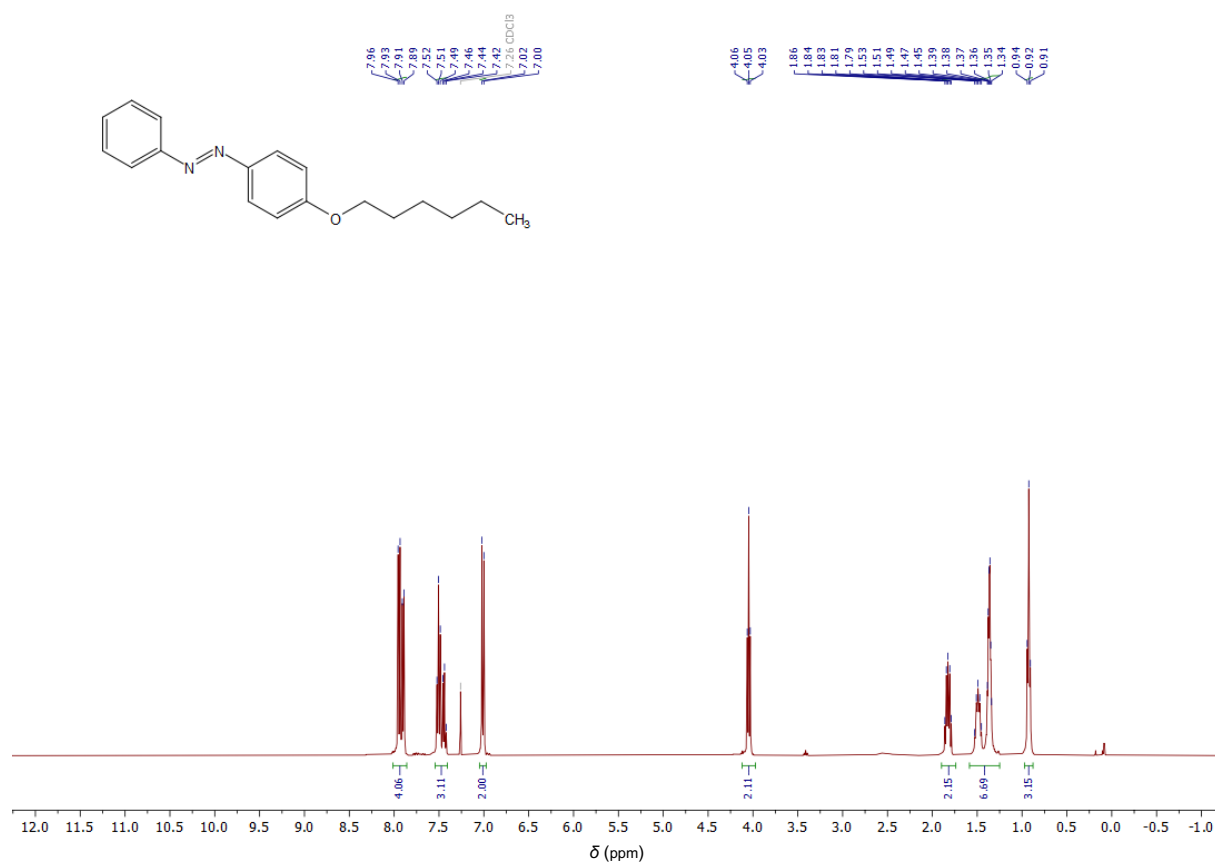

# <sup>1</sup>H-NMR of *p*-OHep-Azobenzene (3d)

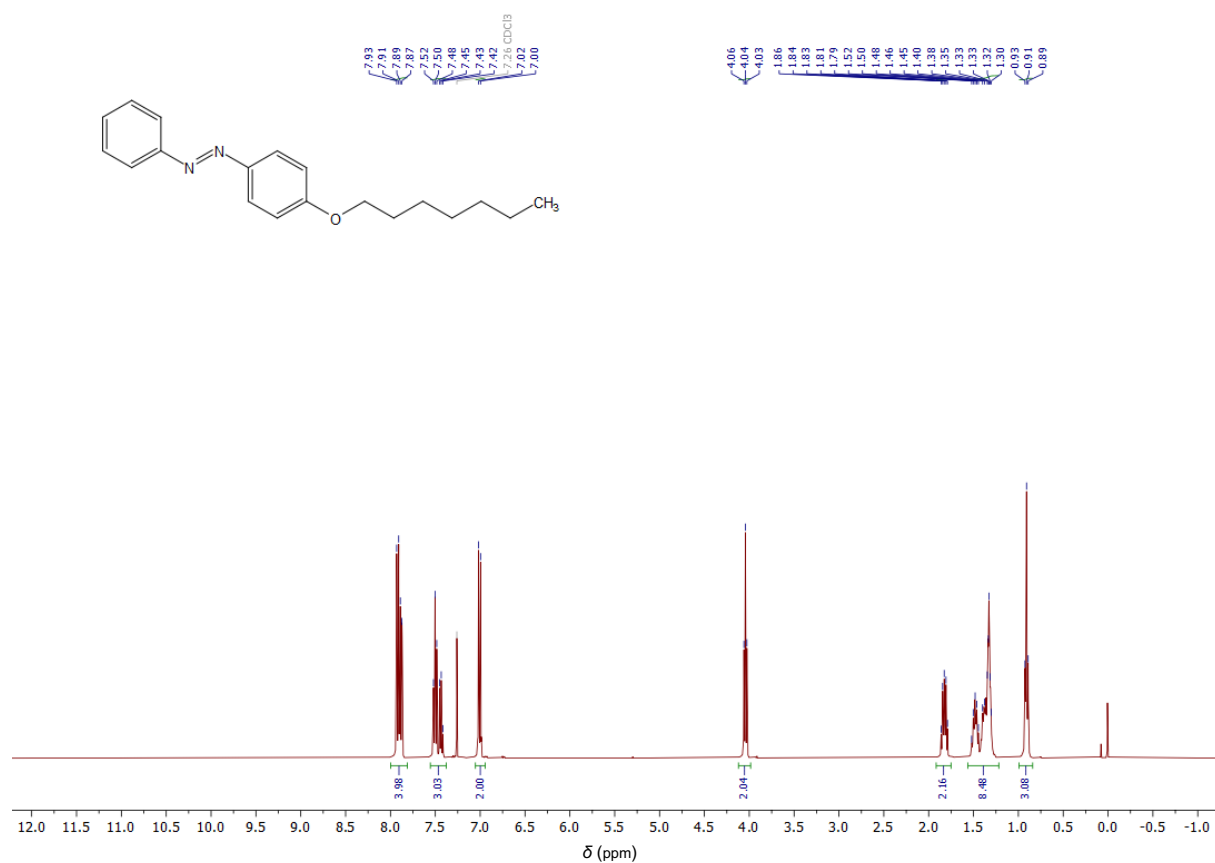

### <sup>13</sup>C-NMR of *p*-OHep-Azobenzene (3d)

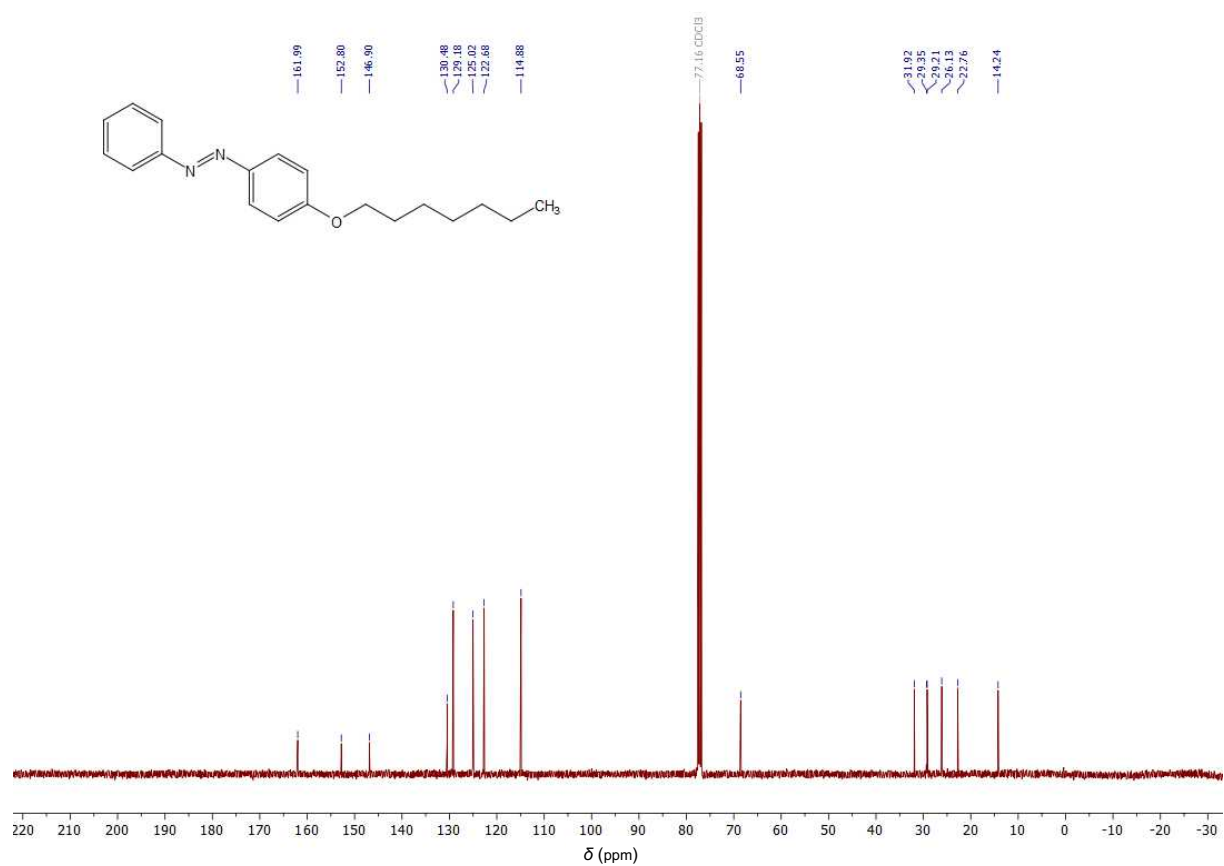

### <sup>1</sup>H-NMR of *p*-OOct-Azobenzene (3e)

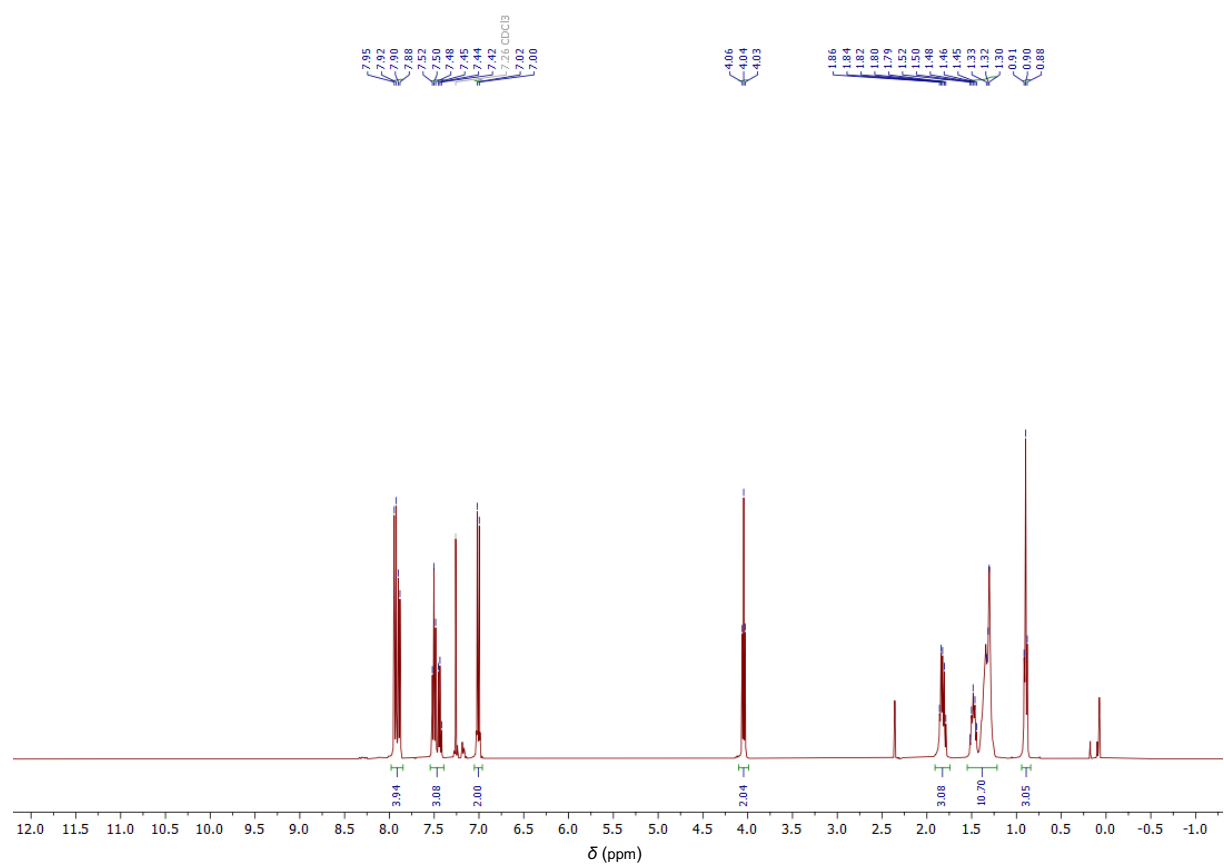

# <sup>1</sup>H-NMR of *p*-ONon-Azobenzene (3f)

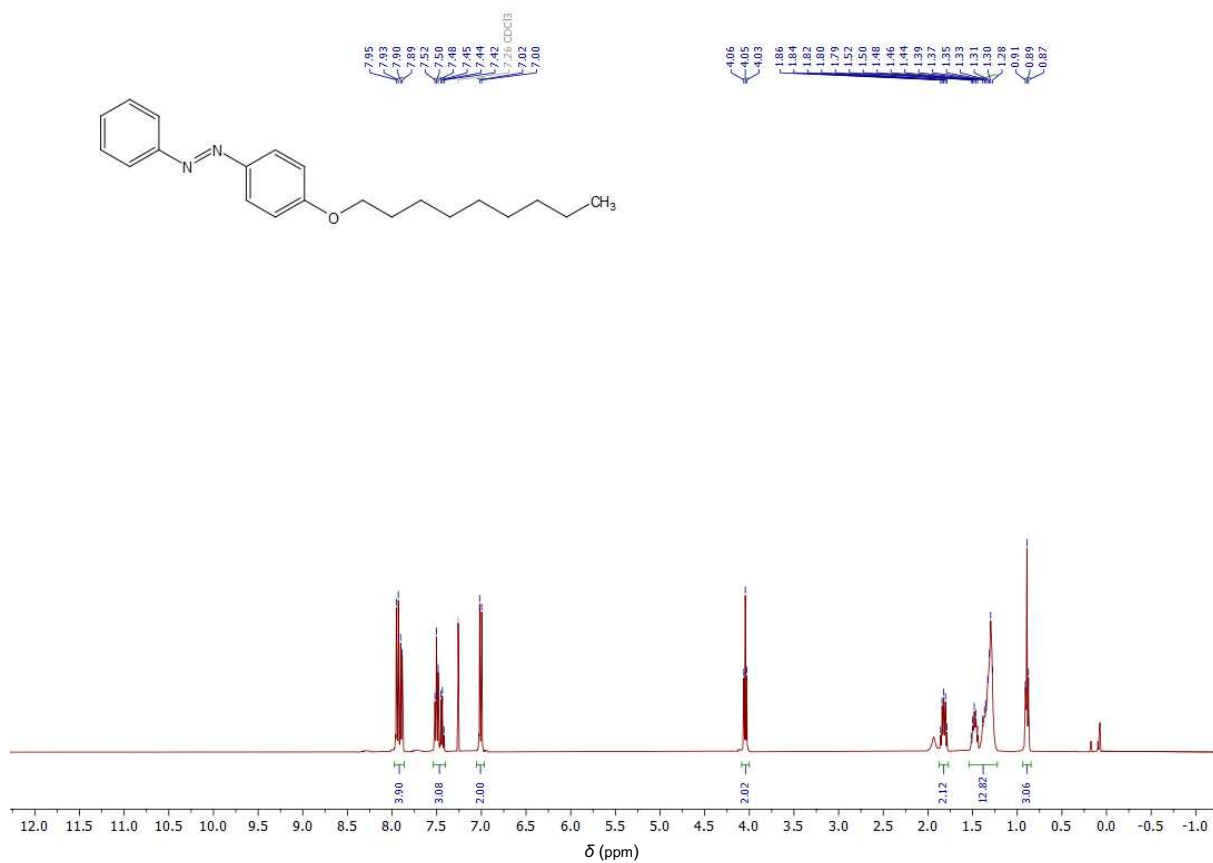

# <sup>13</sup>C-NMR of *p*-ONon-Azobenzene (3f)

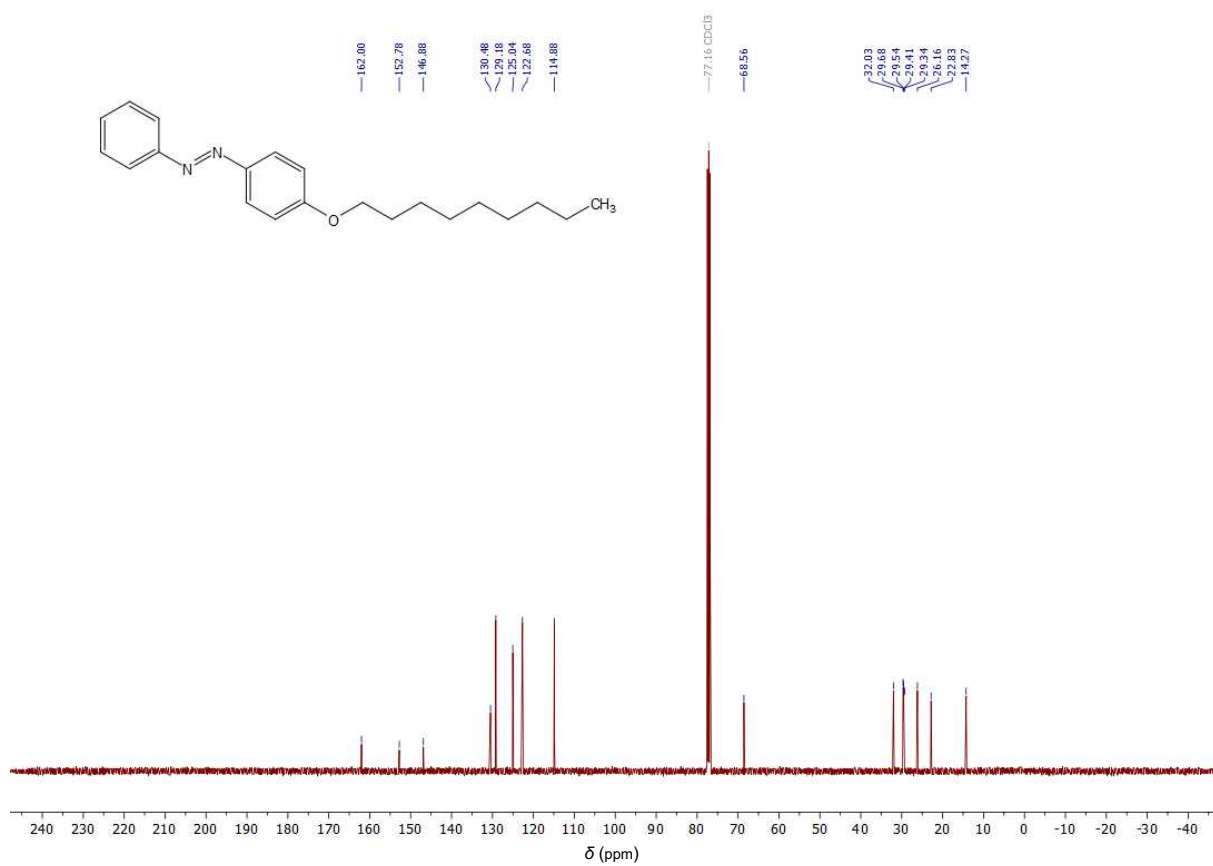

### <sup>1</sup>H-NMR of *p*-ODec-Azobenzene (3g)

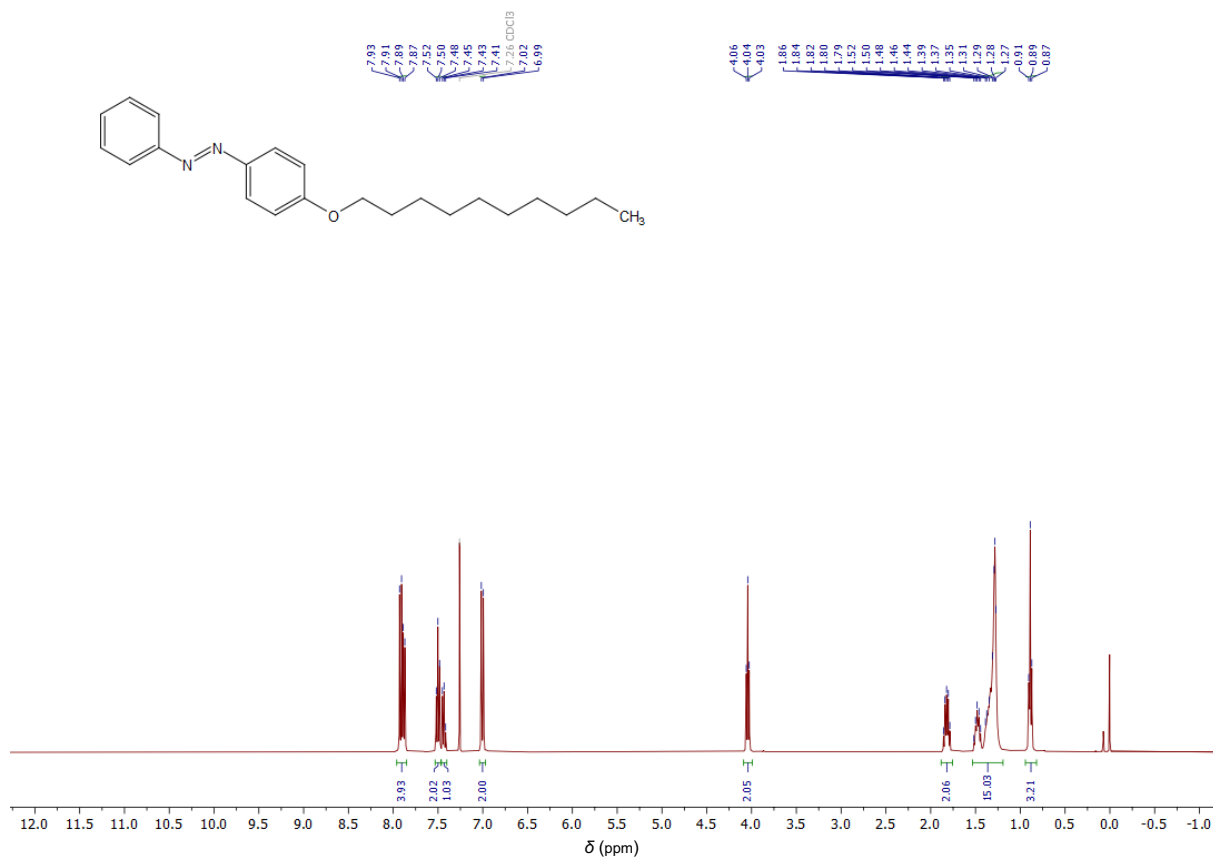

### <sup>1</sup>H-NMR of *p*-OUndec-Azobenzene (3h)

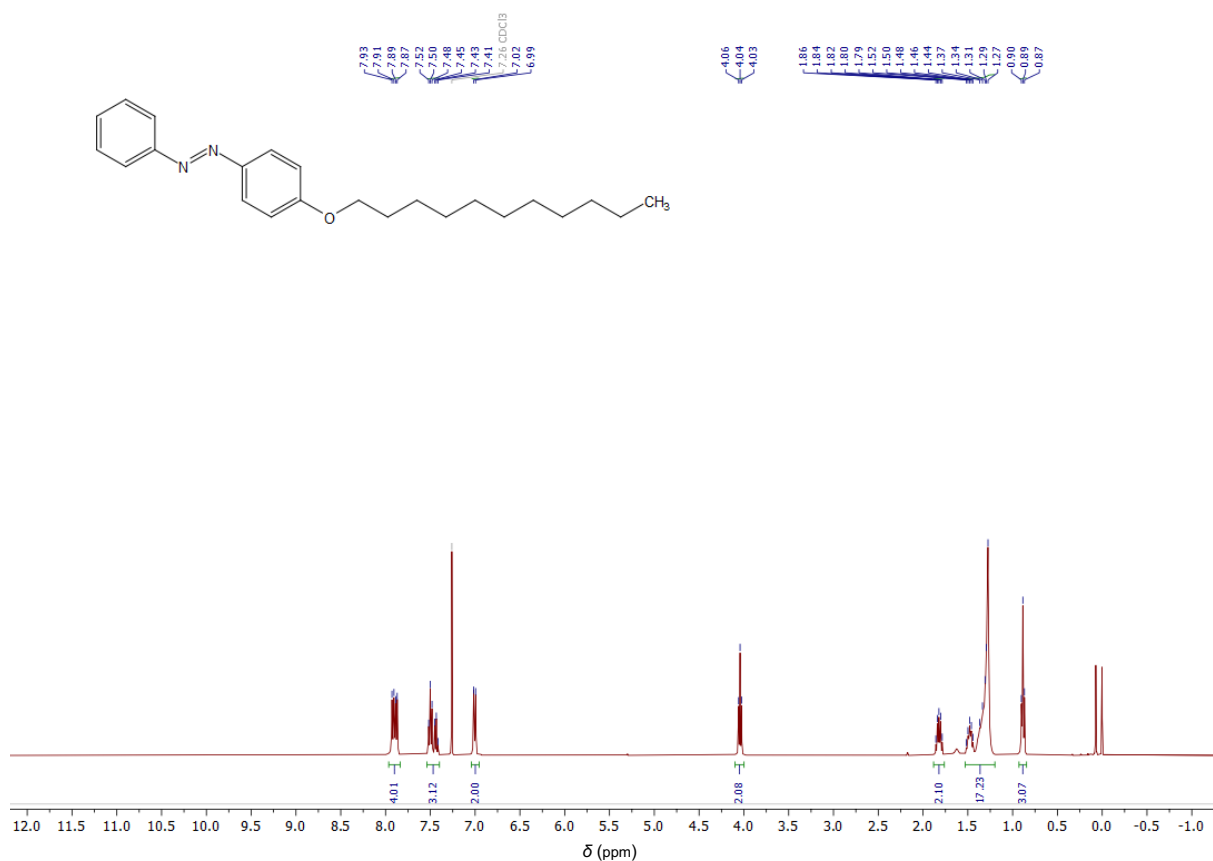

# <sup>12</sup>C-NMR of *p*-OUndec-Azobenzene (3h)

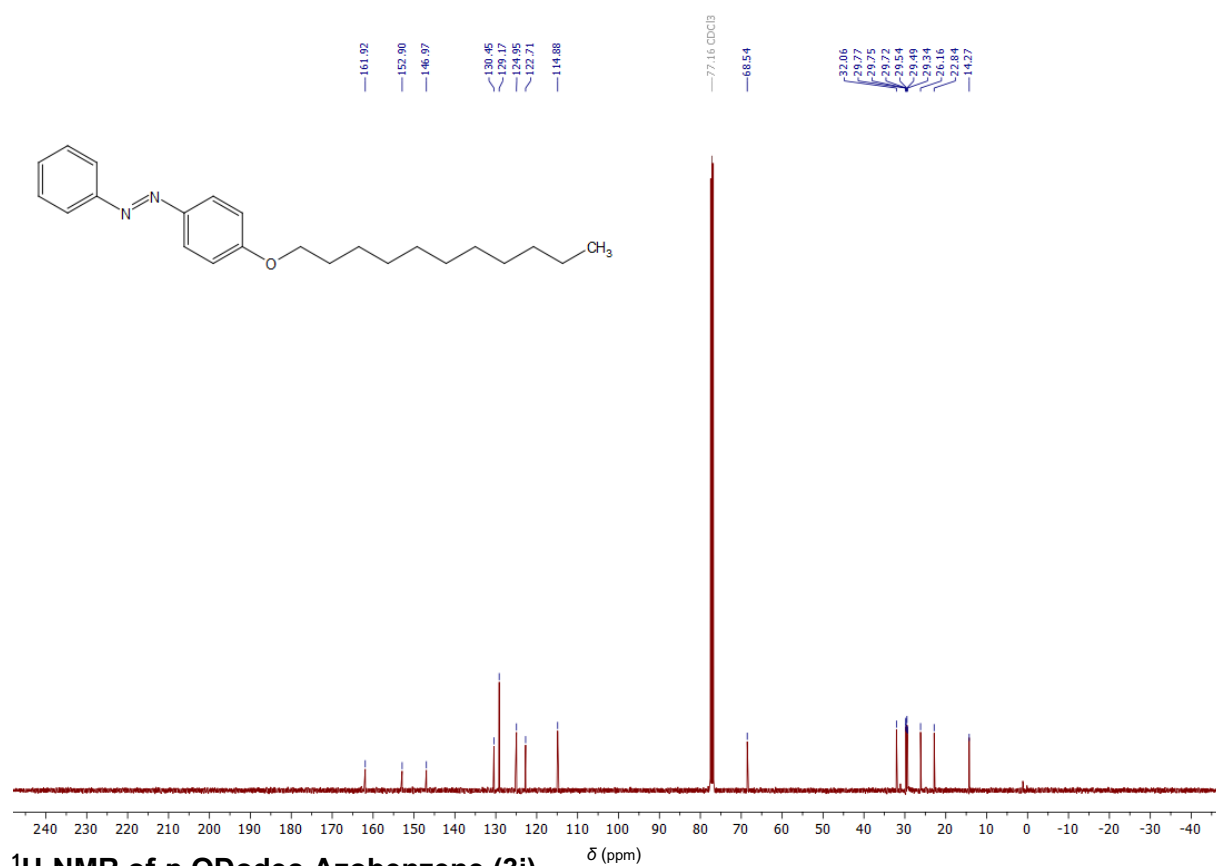

## <sup>1</sup>H-NMR of *p*-ODodec-Azobenzene (3i)

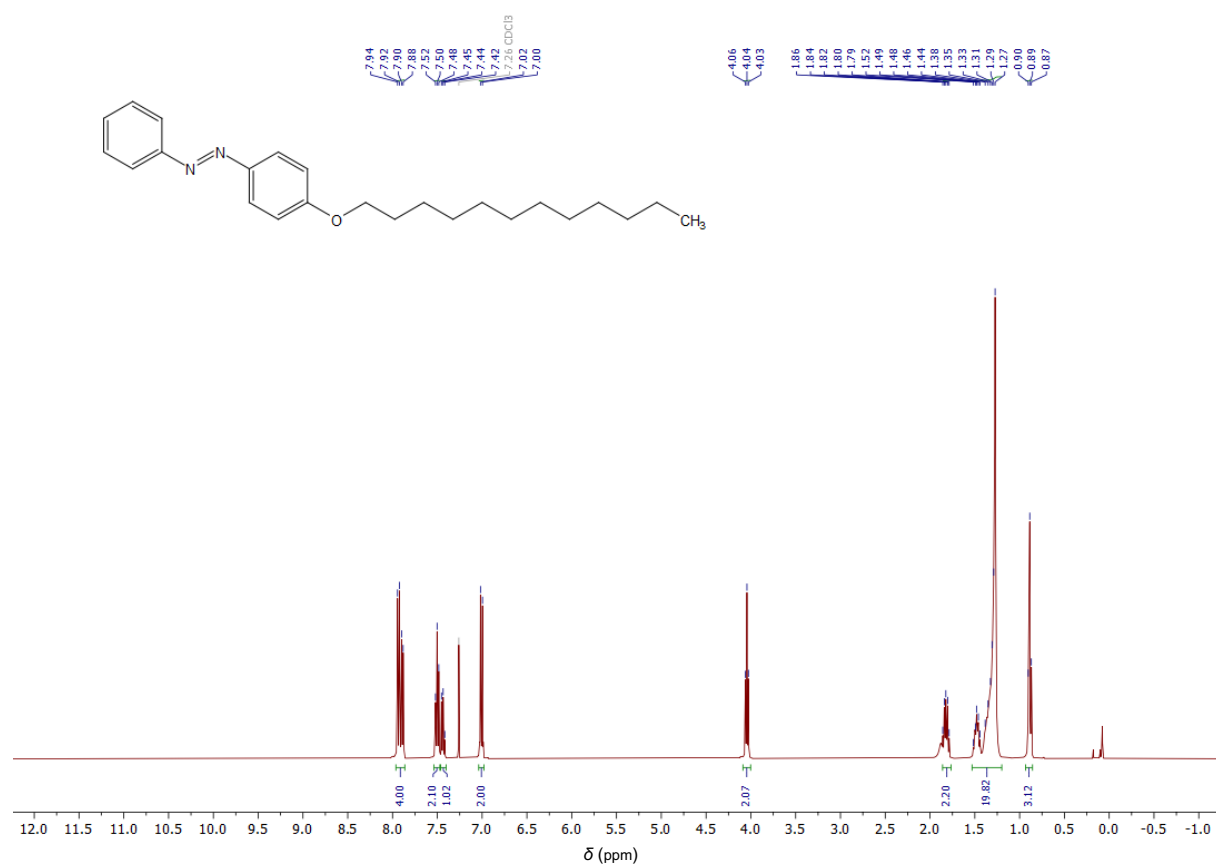



#### 4. Melting Points

**Table S1: Threefold determination of melting points for each *p*-alkoxy-ABs.**

| Compound            | 1. $T_m$ [°C] | 2. $T_m$ [°C] | 3. $T_m$ [°C] | $\varnothing T_m$ [°C] |
|---------------------|---------------|---------------|---------------|------------------------|
| <i>p</i> -OMe-AB    | 55.0          | 54.9          | 55.0          | 55.0                   |
| <i>p</i> -OBu-AB    | 64.4          | 64.3          | 64.3          | 64.3                   |
| <i>p</i> -OPen-AB   | 59.9          | 60.0          | 60.1          | 60.0                   |
| <i>p</i> -OHex-AB   | 57.3          | 57.3          | 57.2          | 57.3                   |
| <i>p</i> -OHep-AB   | 71.1          | 70.8          | 71.1          | 71.0                   |
| <i>p</i> -OOct-AB   | 72.2          | 72.0          | 72.2          | 72.1                   |
| <i>p</i> -ONon-AB   | 78.4          | 78.6          | 78.4          | 78.5                   |
| <i>p</i> -ODec-AB   | 63.0          | 63.1          | 63.0          | 63.0                   |
| <i>p</i> -OUndec-AB | 75.2          | 75.1          | 75.4          | 75.2                   |
| <i>p</i> -Dodec-AB  | 70.6          | 70.4          | 70.4          | 70.5                   |

#### 5. Irradiation experiments

NMR tubes or UV-Vis samples were irradiated in a custom in-house built box using high power LEDs by Thorlabs powered with T-Cube™ LED Driver with Trigger Mode with max. 1200 mA. After the specified irradiation times, the samples were immediately placed and measured in the corresponding spectrometer. The neat compounds were irradiated on a glass slide with a standard size according to DIN ISO 8037/1. For the use of thin films, the compounds were thermally melted between two glass plates, which allowed a better observation of the photoliquefaction.

**Table S2: LEDs used for all irradiation experiments with their specifications.**

| $\lambda_{\max}$ / nm | $\Delta\lambda_{FWHM}$ / nm | Luminous Flux / mW | Product name |
|-----------------------|-----------------------------|--------------------|--------------|
| 265                   | 11                          | 3036               | M265L5       |
| 300                   | 20                          | 2275               | M300L4       |
| 325                   | 12                          | 3120               | M325L5       |
| 365                   | 9                           | 3850               | M365L3       |
| 385                   | 11                          | 3700               | M385L3       |
| 405                   | 12.5                        | 3400               | M405L4       |
| 530                   | 35                          | 3600               | M530L4       |
| 660                   | 20                          | 3120               | M660L4       |

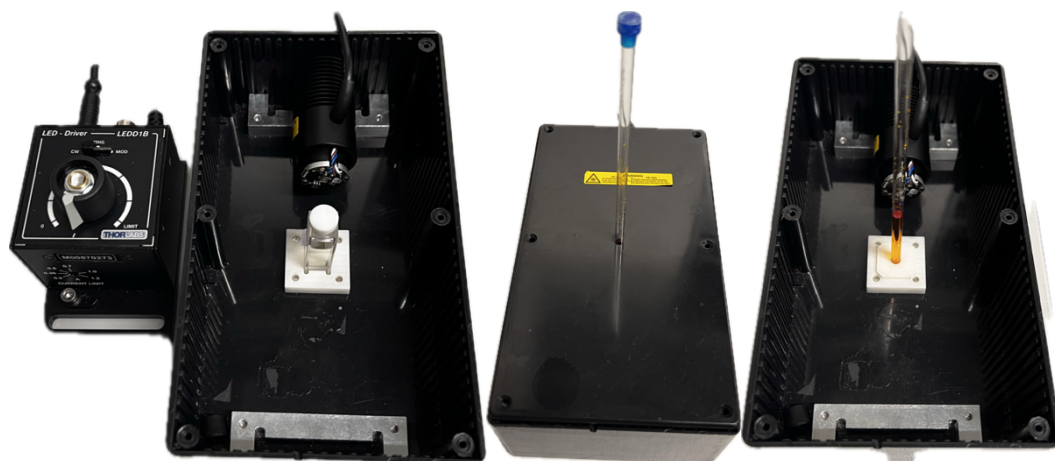

**Figure S1: In-house build LED irradiation box for UV-Vis cuvettes and NMR tubes.**

For the irradiation experiments of the neat compounds, the respective *p*-alkoxy-AB were placed on a glass slide as a thin layer and irradiated with an LED at a variable distance. For the preparation of the thin layers each compound was grinded to obtain an even distributed particle size. To obtain an even and thin layer the fine powders were placed between two glass slides which were pressed together. The exact thickness of the layer and particle size were not determined for the irradiation experiments.

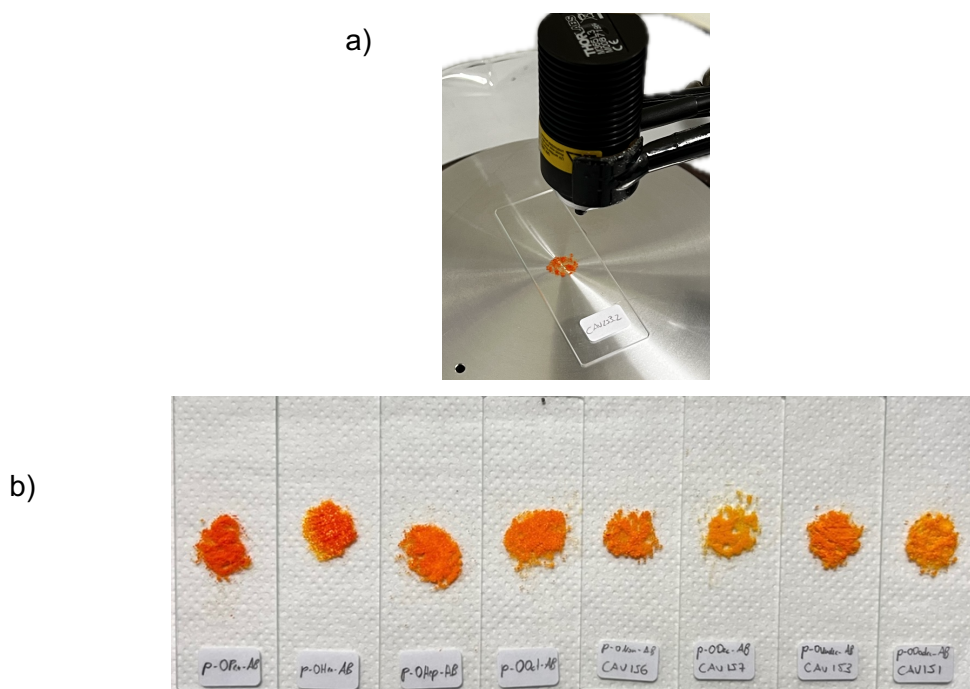

**Figure S2: a) Irradiation of neat compounds on glass slides with 365 nm with 3850 mW on temperature-controlled aluminum block with a distance of about 15 cm and b) prepared samples for irradiation experiments.**

To assess the photoliquefaction of the neat compounds, the respective *p*-alkoxy-AB were applied as thin layer of powder on a slide and then irradiated at room temperature for approx.

18 h at a wavelength of 365 nm. To exclude thermal effects, the LEDs were placed at a distance of approx. 15 cm above the sample. To determine the degree of photoisomerization, the content of the (*E*)- and (*Z*)-isomers was determined by <sup>1</sup>H-NMR spectroscopy. For the irradiation experiments at different ambient temperatures the compounds were thermally melted between two glass plates. The compound was placed on a glass slide and heated until it melted. A second glass plate was then placed on top of the melted compound. The capillary action was used to produce thin and uniform thin films (see Figure S3 a). The thin films were placed on a temperature-controlled aluminum block and then irradiated with 365 nm at a distance of approx. 15 cm. For irradiation at temperatures below room temperature an additional nitrogen stream was used to prevent condensation of water. The thin films were irradiated overnight. By using thin films, successful photoliquefaction could be better evaluated. The thickness of the thin films and the composition after irradiation was not determined.

**Table S3: Determination of composition of *p*-alkoxy-ABs after irradiation of the solid compound with 365 nm for 18 h at rt via <sup>1</sup>H-NMR spectroscopy.**

| Compound | Signal 1<br>( <i>E</i> )-<br>isomer | Signal 1<br>( <i>Z</i> )-<br>isomer | ( <i>Z</i> )-<br>isomer<br>/ % | Signal 2<br>( <i>E</i> )-<br>isomer | Signal 2<br>( <i>Z</i> )-<br>isomer | ( <i>Z</i> )-<br>isomer<br>/ % | Mean<br>( <i>Z</i> )-isomer /<br>% |
|----------|-------------------------------------|-------------------------------------|--------------------------------|-------------------------------------|-------------------------------------|--------------------------------|------------------------------------|
| OBu      | 0.33                                | 2.00                                | 85.8                           | 0.34                                | 1.99                                | 85.4                           | 85.6                               |
| OPen     | 0.32                                | 2.00                                | 86.2                           | 0.25                                | 1.91                                | 88.4                           | 87.3                               |
| OHex     | 0.28                                | 2.00                                | 87.7                           | 0.26                                | 1.98                                | 88.4                           | 88.1                               |
| OHep     | 0.32                                | 2.00                                | 86.2                           | 0.30                                | 1.97                                | 86.8                           | 86.5                               |
| OOct     | 0.26                                | 2.00                                | 88.5                           | 0.26                                | 2.01                                | 88.5                           | 88.5                               |
| ONon     | 2.00                                | 0.95                                | 32.2                           | 2.00                                | 0.98                                | 32.9                           | <b>32.5</b>                        |
| ODec     | 0.35                                | 2.00                                | 85.1                           | 0.30                                | 1.98                                | 86.8                           | 86.0                               |
| OUndec   | 3.25                                | 2.00                                | 38.1                           | 3.21                                | 2.03                                | 38.7                           | <b>38.4</b>                        |
| ODodec   | 0.47                                | 2.00                                | 81.0                           | 0.47                                | 2.01                                | 81.0                           | 81.0                               |

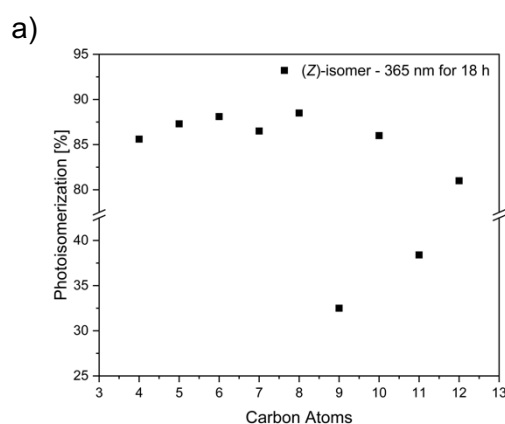

b)

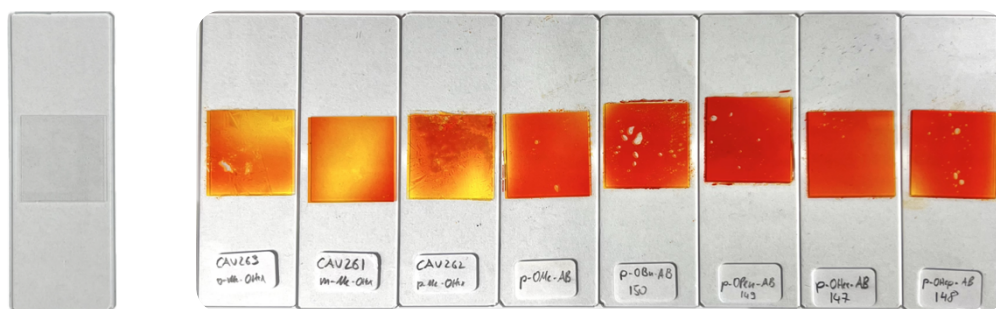

**Figure S3: a) Content of (Z)-isomer after irradiation with 365 nm with 3850 mW for 18 h at rt on temperature-controlled aluminum block with a distance of about 15 cm and b) testing photoliquefaction of neat compounds between two glass slides after photoliquefaction.**

## 6. UV-Vis spectroscopy

The UV-Vis absorption spectra in solution were recorded using a SPECORD® 200 PLUS UV-Vis spectrophotometer equipped with two automatic eightfold cell changers and a Peltier thermostat system for temperature control manufactured by Analytik Jena. The spectrophotometer system was operated by the software Aspect UV from Analytik Jena. The samples were measured in QS High Precision Cells made of Quartz Suprasil® by Hellma Analytics with a light path of 10 mm. The sample volume was 3 mL and the sample concentration  $5 \times 10^{-5}$  M. As solvent UV-Vis graded acetonitrile and water was used from VWR chemicals was used.

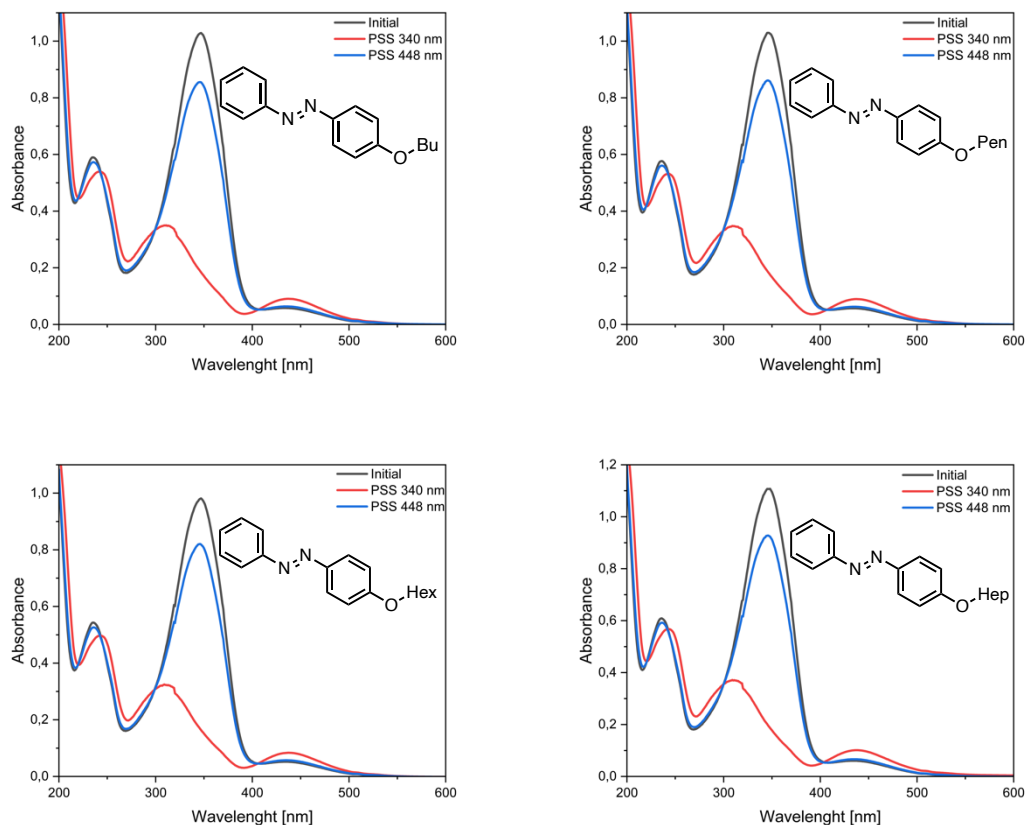

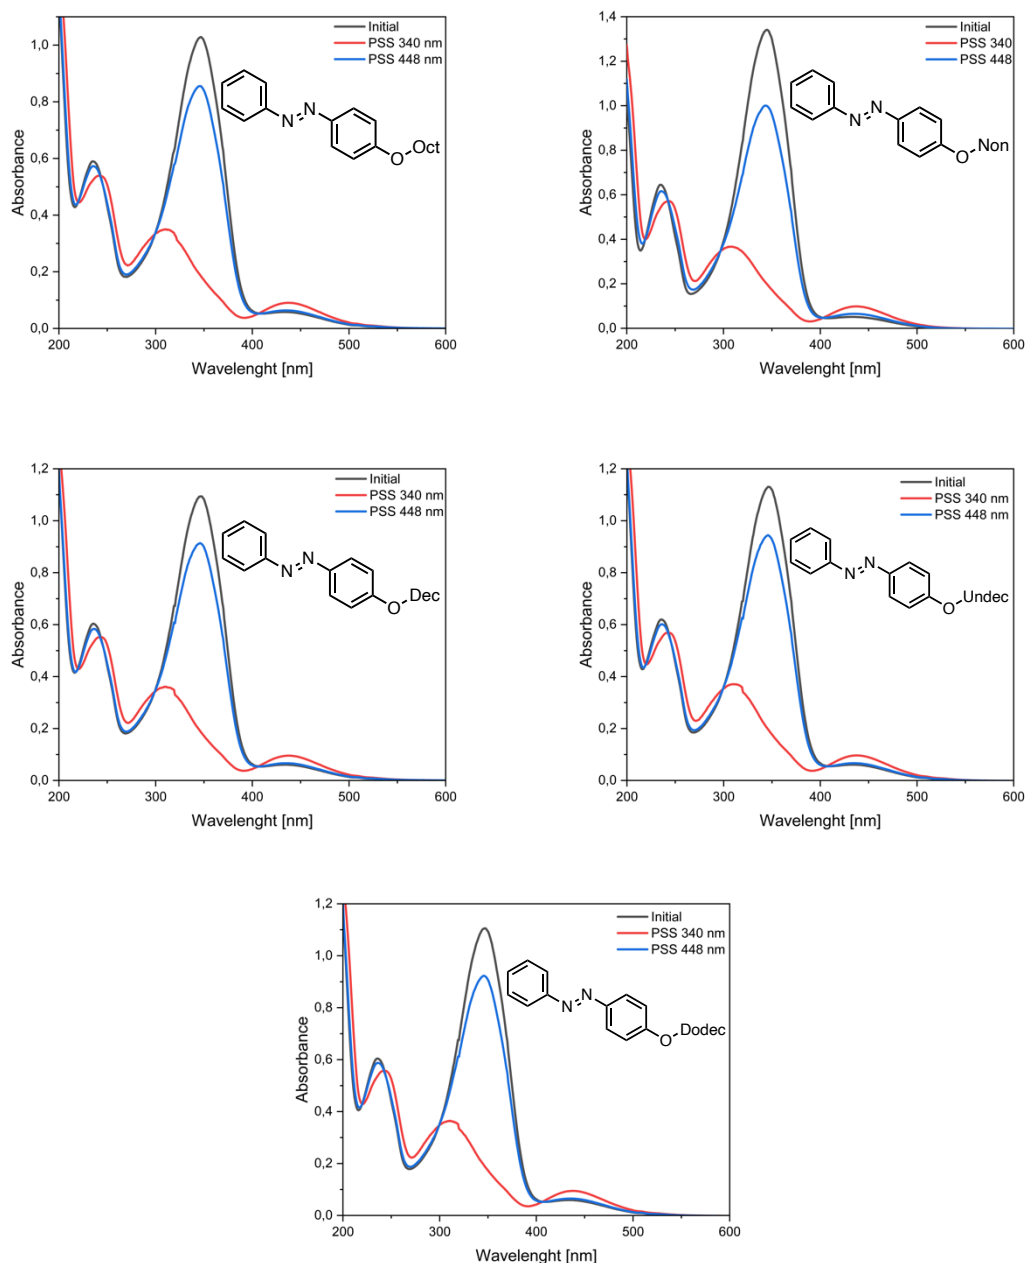

**Figure S4: a) UV-Vis absorption spectra of *p*-alkoxy-AB in ACN.**

UV-Vis absorption spectra of the neat compounds were conducted with thin films. The samples were measured in between two QS High Precision Rectangular Windows made of Quartz Suprasil® by Hellma Analytics with a thickness of 1.25 mm, which were placed in a cell holder for demountable Hellma® High Precision rectangular Cell Type 106. Approx. 5 mg of the sample was heated to the melting point on the glass slides using a hotplate. The second glass plate was then placed on top to create a thin film. Gentle pressure was applied to the two glass plates to produce a uniform and consistent thin film. After the sample had cooled down, the two glass plates were inserted into the cuvette holder. The sample was then irradiated with 365 nm and then 448 nm at short intervals. Absorption spectra were measured between the

time intervals. This process was repeated until no further change in the absorption spectrum was detected.

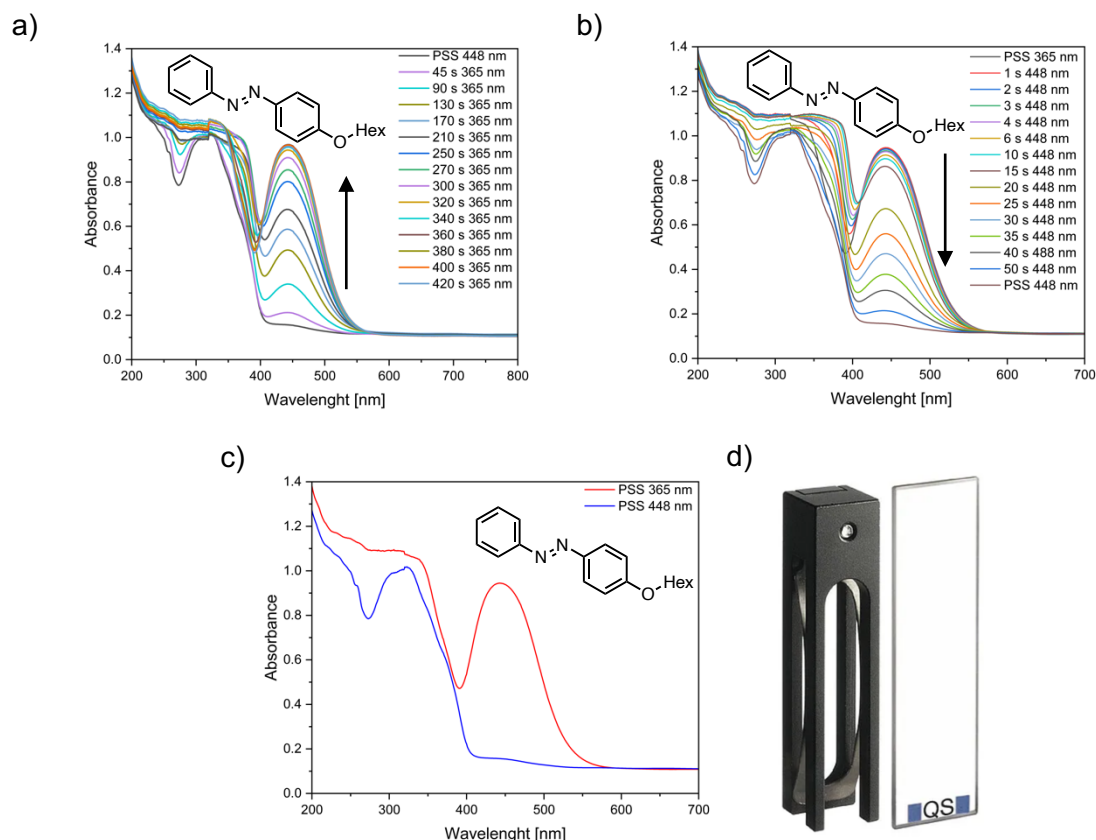

**Figure S5: UV-Vis Absorption spectra of a thin film of *p*-OHex-AB for a) photoliquefaction with 365 nm and b) back switching with 448 nm and c) the corresponding PSS and d) Used rectangular Window and a cell holder.**

## 7. Half-life in solution *via* UV-Vis spectroscopy

All samples were irradiated at the corresponding wavelengths for 5-10 min prior to the kinetic measurements. UV-Vis absorption spectra were recorded from 200 – 600 nm with a scan speed of 20 nm/s. The thermal isomerization was monitored in 30 min intervals at 25 °C for 40 h. All compounds were measured three-fold at concentrations of  $3 \cdot 10^{-5}$  mol/L in acetonitrile. For data analysis, Origin Pro 2023 by Origin Lab Corporation was used. The absorbances  $A$  at the absorption maxima of 346 nm were plotted against the time  $t$  elapsed after the start of the measurements. Rate constants  $k$  and half-lives  $t_{1/2}$  were determined after fitting the data with an Exponential Decay Function (ExpDec1, Origin) according to the literature.

$$y = y_0 + A_1 \cdot e^{-x/t_1}$$

**Equation S1: Exponential Decay 1 function of Origin.**

The exponential time constant  $t_1$  was obtained by fitting the change in absorbance at 346 nm vs. time. The time constant  $t_1$  was further used to calculate the rate constant  $k$  by Equation S2 and the half-life  $t_{1/2}$  by Equation S3.

$$k = 1 / t_1$$

**Equation S2: Calculation of rate constant  $k$ .**

$$t_{1/2} = \ln 2 \cdot t_1$$

**Equation S3: Calculation of half-life  $t_{1/2}$ .**

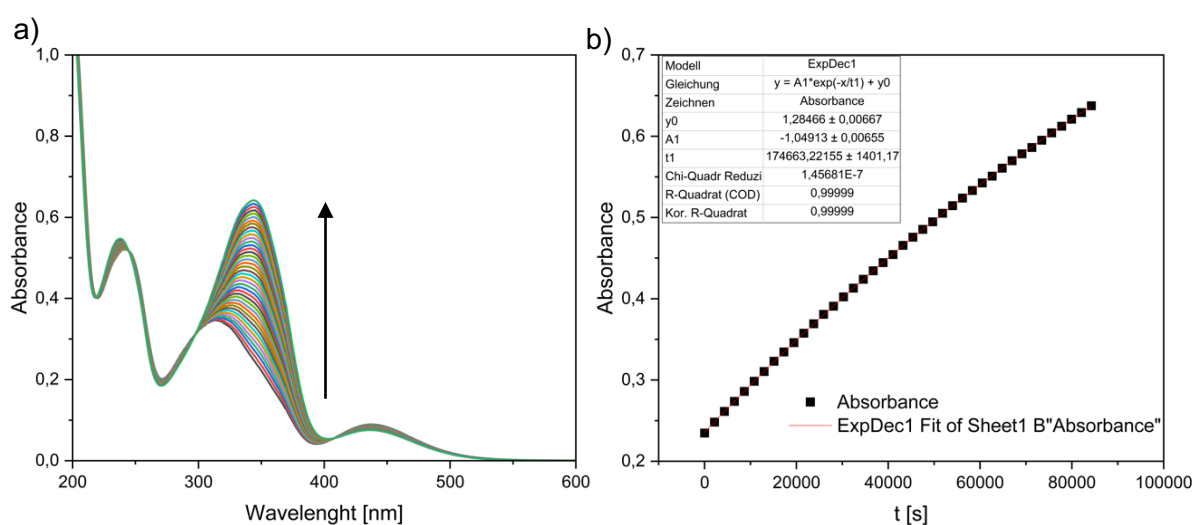

**Figure S6: a) Example of UV-Vis absorption spectra during thermal relaxation at 25 °C in ACN and b) change of the absorption maxima at 346 nm.**

**Table S4: Kinetic constants at 25 °C for *p*-alkoxy-ABs in ACN  $3 \times 10^{-5}$  M.**

| Compound | 1. $k / 10^{-6} \text{ s}^{-1}$ | 2. $k / 10^{-6} \text{ s}^{-1}$ | 3. $k / 10^{-6} \text{ s}^{-1}$ | $\sigma k / 10^{-6} \text{ s}^{-1}$ | $\sigma k / 10^{-6} \text{ s}^{-1}$ |
|----------|---------------------------------|---------------------------------|---------------------------------|-------------------------------------|-------------------------------------|
| OBu      | 3.58                            | 3.04                            | 3.24                            | 3.29                                | 2.2                                 |
| OPen     | 3.95                            | 3.89                            | 4.09                            | 3.98                                | 0.8                                 |
| OHex     | 3.22                            | 3.14                            | 3.10                            | 3.15                                | 0.5                                 |
| OHep     | 3.49                            | 3.75                            | 3.91                            | 3.71                                | 1.7                                 |
| OOct     | 3.12                            | 3.11                            | 3.18                            | 3.14                                | 0.3                                 |
| ONon     | 3.44                            | 3.32                            | 3.45                            | 3.40                                | 0.6                                 |
| ODec     | 3.22                            | 3.11                            | 3.13                            | 3.15                                | 0.5                                 |
| OUndec   | 3.44                            | 3.24                            | 3.38                            | 3.35                                | 0.8                                 |
| ODodec   | 3.52                            | 2.99                            | 3.43                            | 3.31                                | 2.3                                 |

**Table S5: Half-lives at 25 °C for *p*-alkoxy-ABs in ACN 3 x 10<sup>-5</sup> M.**

| Compound | 1. $t_{1/2}$ / h | 2. $t_{1/2}$ / h | 3. $t_{1/2}$ / h | $\sigma$ $t_{1/2}$ / h | $\sigma$ $t_{1/2}$ / h |
|----------|------------------|------------------|------------------|------------------------|------------------------|
| OBu      | 53.83            | 63.34            | 59.43            | 58.9                   | 3.9                    |
| OPen     | 48.69            | 49.45            | 47.11            | 48.4                   | 1.0                    |
| OHex     | 59.72            | 61.42            | 62.12            | 61.1                   | 1.0                    |
| OHep     | 55.24            | 51.41            | 49.26            | 52.0                   | 2.5                    |
| OOct     | 61.74            | 61.90            | 60.46            | 61.4                   | 0.6                    |
| ONon     | 55.99            | 58.07            | 55.89            | 56.7                   | 1.0                    |
| ODec     | 59.81            | 61.96            | 61.52            | 61.1                   | 0.9                    |
| OUndec   | 55.93            | 59.49            | 57.04            | 57.5                   | 1.5                    |
| ODodec   | 54.75            | 64.42            | 56.17            | 58.5                   | 4.3                    |

## 8. Determination of PSS in solution and neat *via* HPLC

The PSS isomer concentrations were determined with a Shimadzu LCMS-2020 system using a 150 x 4 mm Eurospher 100<sup>-5</sup> C18 column with acetonitrile/water (90:10) as isocratic eluent (1.5 mL/min). Detection was carried out using a Shimadzu SPD-M20A diode array detector at the previously determined isosbestic wavelengths. Therefore, a UV-Vis absorption spectra was measured each compound in acetonitrile (see Figure S4) and acetonitrile/water (90:10) (see Figure S7). The change from pure acetonitrile to acetonitrile/water (90:10) in the separation had only a negligible effect on the isosbestic wavelengths.

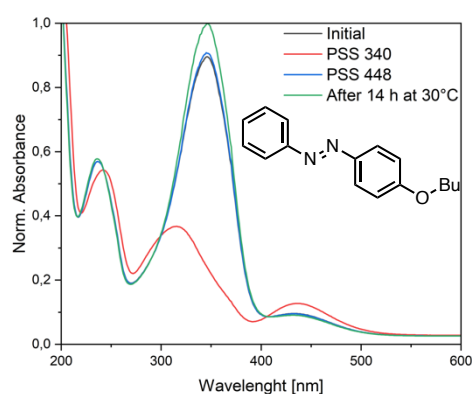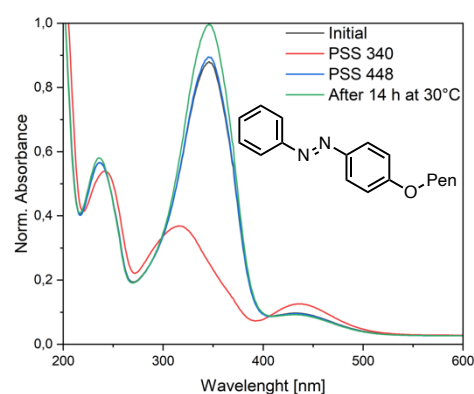



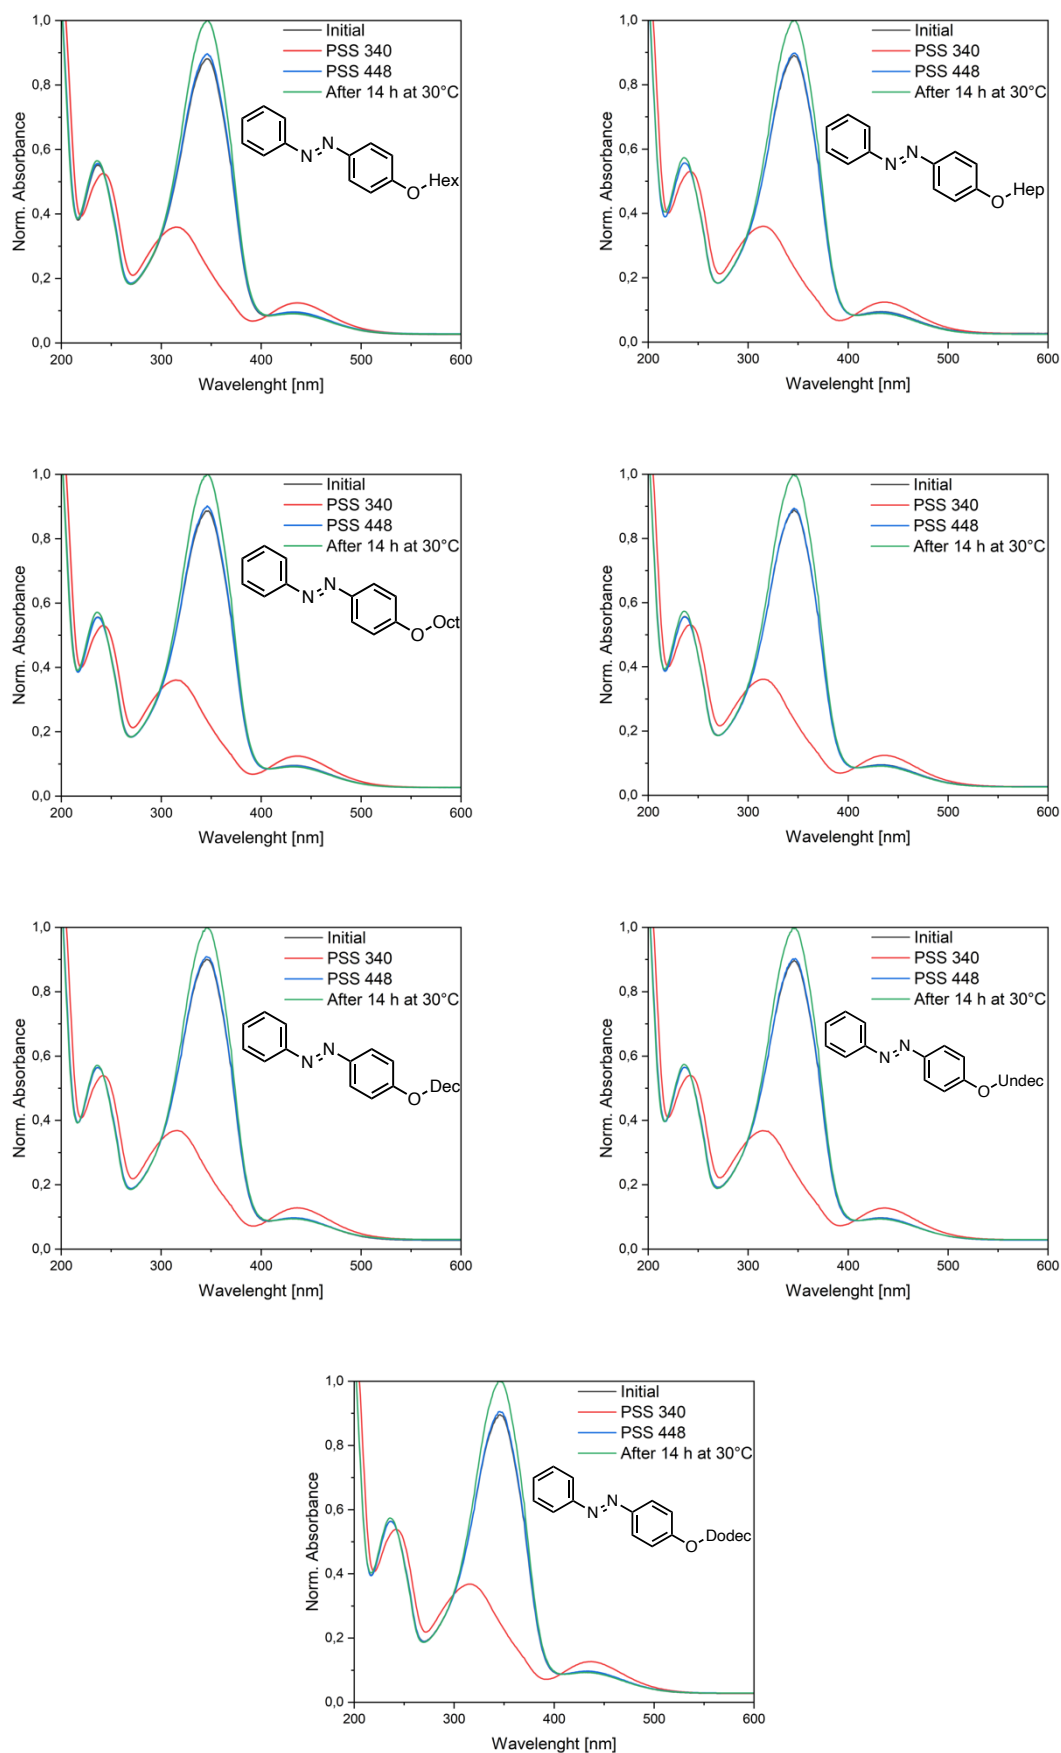

**Figure S7: UV-Vis Absorption spectra of corresponding *p*-alkoxy-ABs in ACN:H<sub>2</sub>O (90:10) with a concentration of  $5 \times 10^{-5}$  M.**

**Table S6: Isosbestic points of *p*-alkoxy-ABs in ACN:H<sub>2</sub>O (90:10) for determination of the composition of (*E*)- and (*Z*)-isomers via HPLC.**

| Compound            | Isosbestic point / nm |
|---------------------|-----------------------|
| <i>p</i> -OBu-AB    | 299                   |
| <i>p</i> -OPen-AB   | 299                   |
| <i>p</i> -OHex-AB   | 299                   |
| <i>p</i> -OHep-AB   | 299                   |
| <i>p</i> -OOct-AB   | 299                   |
| <i>p</i> -ONon-AB   | 299                   |
| <i>p</i> -OUndec-AB | 300                   |
| <i>p</i> -ODodec-AB | 300                   |

By integration of the signals of the respective isomers in the PSS for 340 nm and 448 nm in the chromatogram at the wavelength of the isosbestic point, the composition of the isomers was determined. The samples were dissolved in 2 mL glass vials in acetonitrile with a concentration of  $5 \cdot 10^{-4}$  mol/L, from which aliquots of 10  $\mu$ L were injected for analysis. For all determined isomer ratios, an error of  $\pm 1\%$  is assumed. Each dissolved sample was irradiated with 340 nm or 448 nm for 5 - 10 min.

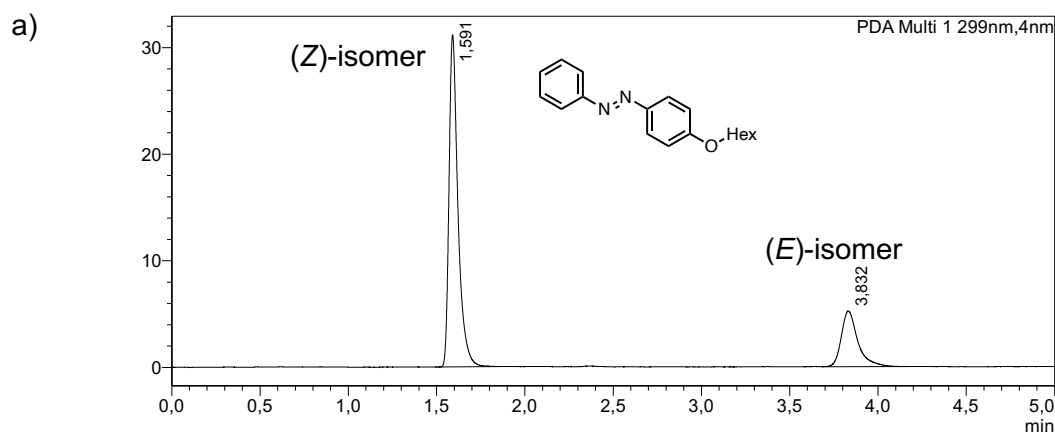

| Peak Table |           |        |        |        |
|------------|-----------|--------|--------|--------|
| Peak#      | Ret. Time | Area   | Height | Conc.  |
| 1          | 1.591     | 109622 | 30596  | 76.364 |
| 2          | 3.832     | 33931  | 5211   | 23.636 |
| Total      |           | 143553 | 35807  |        |

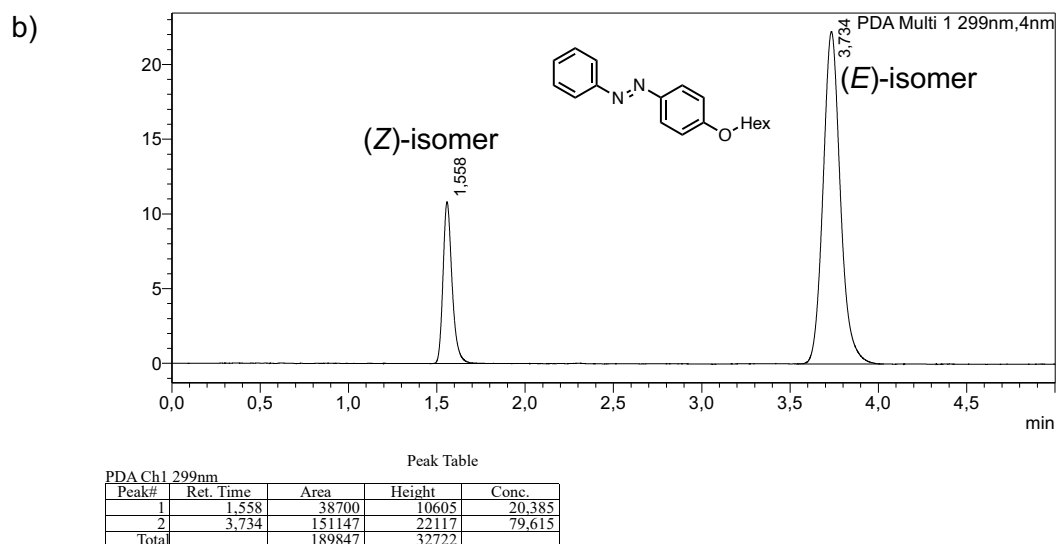

**Figure S8:** Example of chromatograms of the PSSs of *p*-Ohex-AB, detected at the isosbestic wavelength of 299 nm a) after irradiation with 340 nm for 5 min and b) after irradiation with 448 nm for 5 min.

**Table S7:** Threefold determination of the PSS at 340 nm and 448 nm in ACN *via* HPLC.

|                    |       | PSS <sub>340</sub> / % |                     | PSS <sub>448</sub> / % |                     |
|--------------------|-------|------------------------|---------------------|------------------------|---------------------|
|                    |       | ( <i>E</i> )-Isomer    | ( <i>Z</i> )-Isomer | ( <i>E</i> )-Isomer    | ( <i>Z</i> )-Isomer |
| <i>p</i> -OBu-AB   | Run 1 | 23.6                   | 76.4                | 79.6                   | 20.4                |
|                    | Run 2 | 22.9                   | 77.1                | 79.6                   | 20.4                |
|                    | Run 3 | 22.7                   | 77.3                | 79.6                   | 20.4                |
|                    | Mean  | 23.1                   | 76.9                | 79.6                   | 20.4                |
|                    | Δ     | 0.4                    | 0.4                 | 0                      | 0                   |
| <i>p</i> -OPen-AB  | Run 1 | 23.2                   | 76.8                | 79.6                   | 20.4                |
|                    | Run 2 | 22.9                   | 77.1                | 79.6                   | 20.4                |
|                    | Run 3 | 22.7                   | 77.3                | 79.8                   | 20.2                |
|                    | Mean  | 22.9                   | 77.1                | 79.7                   | 20.3                |
|                    | Δ     | 0.3                    | 0.2                 | 0.1                    | 0.1                 |
| <i>p</i> -OHex-AB  | Run 1 | 23.6                   | 76.4                | 79.8                   | 20.2                |
|                    | Run 2 | 26.2                   | 73.8                | 79.6                   | 20.4                |
|                    | Run 3 | 22.4                   | 77.6                | 79.8                   | 20.2                |
|                    | Mean  | 24.1                   | 75.9                | 79.7                   | 20.3                |
|                    | Δ     | 1.9                    | 1.6                 | 0.1                    | 0.1                 |
| <i>p</i> -OHept-AB | Run 1 | 26.7                   | 73.3                | 80.2                   | 19.8                |
|                    | Run 2 | 25.3                   | 74.7                | 80.1                   | 19.9                |
|                    | Run 3 | 24.5                   | 75.5                | 80.2                   | 19.8                |
|                    | Mean  | 25.5                   | 74.5                | 80.2                   | 19.8                |

|                     |          |      |      |      |      |
|---------------------|----------|------|------|------|------|
|                     | $\Delta$ | 1.1  | 0.9  | 0.0  | 0.0  |
| <i>p</i> -Oct-AB    | Run 1    | 25.2 | 74.5 | 80.5 | 19.5 |
|                     | Run 2    | 25.4 | 74.6 | 80.6 | 19.4 |
|                     | Run 3    | 25.1 | 74.9 | 80.4 | 19.6 |
|                     | Mean     | 25.3 | 74.7 | 80.5 | 19.5 |
|                     | $\Delta$ | 0.2  | 0.21 | 0.1  | 0.1  |
| <i>p</i> -ONon-AB   | Run 1    | 25.9 | 74.1 | 81.0 | 19.0 |
|                     | Run 2    | 27.1 | 72.9 | 80.8 | 19.2 |
|                     | Run 3    | 26.1 | 73.9 | 80.8 | 19.2 |
|                     | Mean     | 26.4 | 73.6 | 80.9 | 19.1 |
|                     | $\Delta$ | 0.6  | 0.6  | 0.1  | 0.1  |
| <i>p</i> -ODec-AB   | Run 1    | 25.4 | 74.4 | 80.2 | 19.8 |
|                     | Run 2    | 27.3 | 72.7 | 79.9 | 20.1 |
|                     | Run 3    | 29.0 | 71.0 | 80.1 | 19.9 |
|                     | Mean     | 27.3 | 72.7 | 80.1 | 19.9 |
|                     | $\Delta$ | 1.7  | 1.4  | 0.1  | 0.1  |
| <i>p</i> -OUndec-AB | Run 1    | 27.0 | 73.0 | 81.1 | 18.9 |
|                     | Run 2    | 26.8 | 73.2 | 80.8 | 19.2 |
|                     | Run 3    | 27.2 | 72.8 | 81.3 | 18.7 |
|                     | Mean     | 27.0 | 73.0 | 81.0 | 19.0 |
|                     | $\Delta$ | 0.2  | 0.2  | 0.2  | 0.2  |
| <i>p</i> -ODodec-AB | Run 1    | 28.8 | 71.2 | 82.5 | 17.5 |
|                     | Run 2    | 25.6 | 74.4 | 81.8 | 18.2 |
|                     | Run 3    | 25.6 | 74.4 | 81.1 | 18.9 |
|                     | Mean     | 26.7 | 73.3 | 81.8 | 18.2 |
|                     | $\Delta$ | 1.8  | 1.5  | 0.6  | 0.6  |

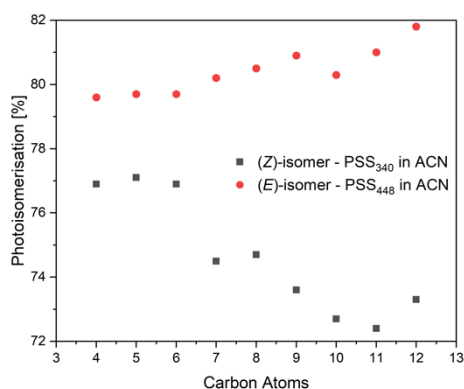

**Figure S9: Content of (E)- and (Z)-Isomer at the PSS for 365 nm and 448 nm in ACN.**

To determine the composition of the isomers at PSS<sub>365</sub> of the neat compounds, the solid *p*-alkoxy-AB was placed as a fine powder as a thin layer on a glass slide according to the procedure for the preparation of thin layers of the compounds on a glass slide explained in section 5. Irradiation experiments (see Figure S2a). Each compound was irradiated with a LED at 365 nm with a distance of approx. 10 cm at rt. The samples were irradiated until they fully turned into the liquid phase. Irradiation was continued until no further changes in composition could be detected *via* HPLC.

**Table S8: Determination of the PSS at 365 nm of neat *p*-alkoxy-AB's *via* HPLC.**

| Compound            | (Z)-isomer / % |
|---------------------|----------------|
| <i>p</i> -OBu-AB    | 91.6           |
| <i>p</i> -OPen-AB   | 92.8           |
| <i>p</i> -OHex-AB   | 93.3           |
| <i>p</i> -OHep-AB   | 93.3           |
| <i>p</i> -OOct-AB   | 93.8           |
| <i>p</i> -ONon-AB   | 92.7           |
| <i>p</i> -ODec-AB   | 94.5           |
| <i>p</i> -OUndec-AB | 93.5           |
| <i>p</i> -ODodec-AB | 94.4           |

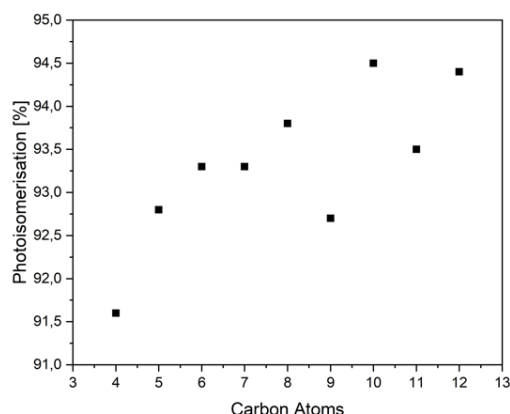

**Figure S10:** Content of (Z)-Isomer at the PSS<sub>365</sub> after irradiation of neat *p*-alkoxy-AB with 365 nm with 3850 mW at rt on temperature-controlled aluminum black with a distance of about 10 cm.

### 9. Neat half-life via HPLC and UV-Vis spectroscopy

To determine the thermal half-life of the neat *p*-alkoxy-ABs, a thin powder layer of the respective compound was placed on a glass slide according to the procedure for the preparation of thin layers of the compounds on a glass slide explained in section 5. Irradiation experiments (see Figure S2 a). Each compound was irradiated overnight at a wavelength of 365 nm with a distance of about 10 cm at room temperature. Each compound was irradiated until no further changes in the composition of (*E*)- and (*Z*)-isomers was measured via HPCL. In an interval of 1 h aliquots of the respective compounds were taken with a spatula and dissolved in about 0.5 mL ACN in a 2 mL vial. The isomer composition was determined by HPLC. The measurements were taken over a period of 11 h at room temperature.

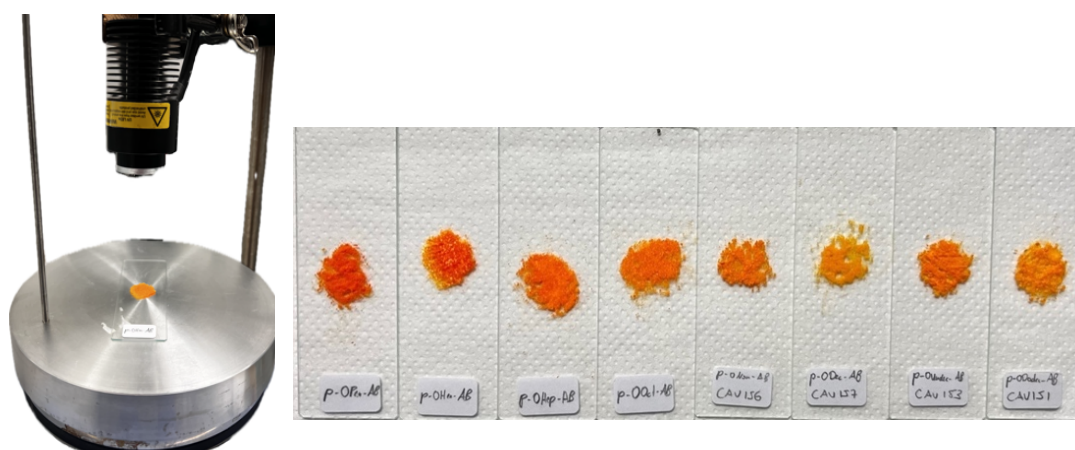

**Figure S11:** Irradiation setup for irradiation with 365 nm with 3850 mW at rt on temperature-controlled aluminum block with a distance of about 10 cm and neat samples before irradiation for kinetic measurements.

**Table S9: Content of the (Z)-isomer during thermal relaxation at rt of neat *p*-OBu-AB.**

| Time / min | (Z)-Isomer / % | Time / min | (Z)-Isomer / % | Time / min | (Z)-Isomer / % |
|------------|----------------|------------|----------------|------------|----------------|
| 0          | 91.58          | 300        | 82.81          | 600        | 74.89          |
| 60         | 89.95          | 360        | 81.27          | 660        | 72.62          |
| 120        | 87.94          | 420        | 79.25          | 3020       | 34.92          |
| 180        | 86.39          | 480        | 77.38          | 3378       | 32.73          |
| 240        | 84.64          | 540        | 75.92          | 4585       | 24.37          |

**Table S10: Content of the (Z)-isomer during thermal relaxation at rt of neat *p*-OPen-AB.**

| Time / min | (Z)-Isomer / % | Time / min | (Z)-Isomer / % | Time / min | (Z)-Isomer / % |
|------------|----------------|------------|----------------|------------|----------------|
| 0          | 92.44          | 360        | 81.95          | 1320       | 52.60          |
| 60         | 90.97          | 420        | 79.94          | 1440       | 57.60          |
| 120        | 88.89          | 480        | 78.26          | 3015       | 36.45          |
| 180        | 86.79          | 540        | 76.71          | 3373       | 34.57          |
| 240        | 85.21          | 600        | 75.33          | 4586       | 24.34          |
| 300        | 83.35          | 660        | 73.40          |            |                |

**Table S11: Content of the (Z)-isomer during thermal relaxation at rt of neat *p*-OHex-AB.**

| Time / min | (Z)-Isomer / % | Time / min | (Z)-Isomer / % | Time / min | (Z)-Isomer / % |
|------------|----------------|------------|----------------|------------|----------------|
| 0          | 93.21          | 360        | 81.60          | 1320       | 57.70          |
| 60         | 91.37          | 420        | 80.04          | 1440       | 51.00          |
| 120        | 89.13          | 480        | 78.89          | 3028       | 40.61          |
| 180        | 87.62          | 540        | 77.54          | 3369       | 35.92          |
| 240        | 85.67          | 600        | 75.71          | 4580       | 22.81          |
| 300        | 84.02          | 660        | 73.79          |            |                |

**Table S12: Content of the (Z)-isomer during thermal relaxation at rt of neat *p*-OHep-AB.**

| Time / min | (Z)-Isomer / % | Time / min | (Z)-Isomer / % | Time / min | (Z)-Isomer / % |
|------------|----------------|------------|----------------|------------|----------------|
| 0          | 93.93          | 360        | 82.86          | 3000       | 41.27          |
| 60         | 91.90          | 420        | 81.94          | 3365       | 29.57          |
| 120        | 90.00          | 480        | 80.32          | 4576       | 28.67          |
| 180        | 88.26          | 540        | 76.74          |            |                |
| 240        | 86.34          | 600        | 74.99          |            |                |
| 300        | 84.65          | 660        | 75.13          |            |                |

**Table S13: Content of the (Z)-isomer during thermal relaxation at rt of neat *p*-OOct-AB.**

| Time / min | (Z)-Isomer / % | Time / min | (Z)-Isomer / % | Time / min | (Z)-Isomer / % |
|------------|----------------|------------|----------------|------------|----------------|
| 0          | 94.01          | 360        | 82.18          | 660        | 69.90          |
| 60         | 91.99          | 420        | 80.49          | 1320       | 63.10          |
| 120        | 89.91          | 480        | 80.28          | 3004       | 29.40          |
| 180        | 88.10          | 490        | 79.10          | 3364       | 35.64          |
| 240        | 86.35          | 540        | 76.56          | 4576       | 28.19          |
| 300        | 84.79          | 600        | 69.00          |            |                |

**Table S14: Content of the (Z)-isomer during thermal relaxation at rt of neat *p*-ODec-AB.**

| Time / min | (Z)-Isomer / % | Time / min | (Z)-Isomer / % | Time / min | (Z)-Isomer / % |
|------------|----------------|------------|----------------|------------|----------------|
| 0          | 94.21          | 300        | 84.36          | 600        | 74.38          |
| 60         | 92.39          | 360        | 82.73          | 660        | 72.76          |
| 120        | 89.96          | 420        | 77.67          | 3008       | 40.08          |
| 180        | 88.39          | 480        | 77.31          | 3363       | 35.41          |
| 240        | 86.48          | 540        | 77.84          | 4580       | 32.48          |

The change of the concentration of the (Z)-isomers were plotted against the time  $t$  elapsed after the start of the measurements. Rate constants  $k$  and half-lives  $t_{1/2}$  were determined after fitting the data with an Exponential Decay Function (ExpDec1, Origin). For data analysis, Origin Pro 2023 by Origin Lab Corporation was used. The exponential time constant  $t_1$  was obtained by fitting the change in the concentration of the (Z)-isomers vs. time. The time constant  $t_1$  was further used to calculate the rate constant  $k$  by Equation S2 and the half-life  $t_{1/2}$  by Equation S3. For *p*-ONon-AB, *p*-Undec-AB and *p*-Dodec-AB non neat kinetic investigation was made do to decomposition.



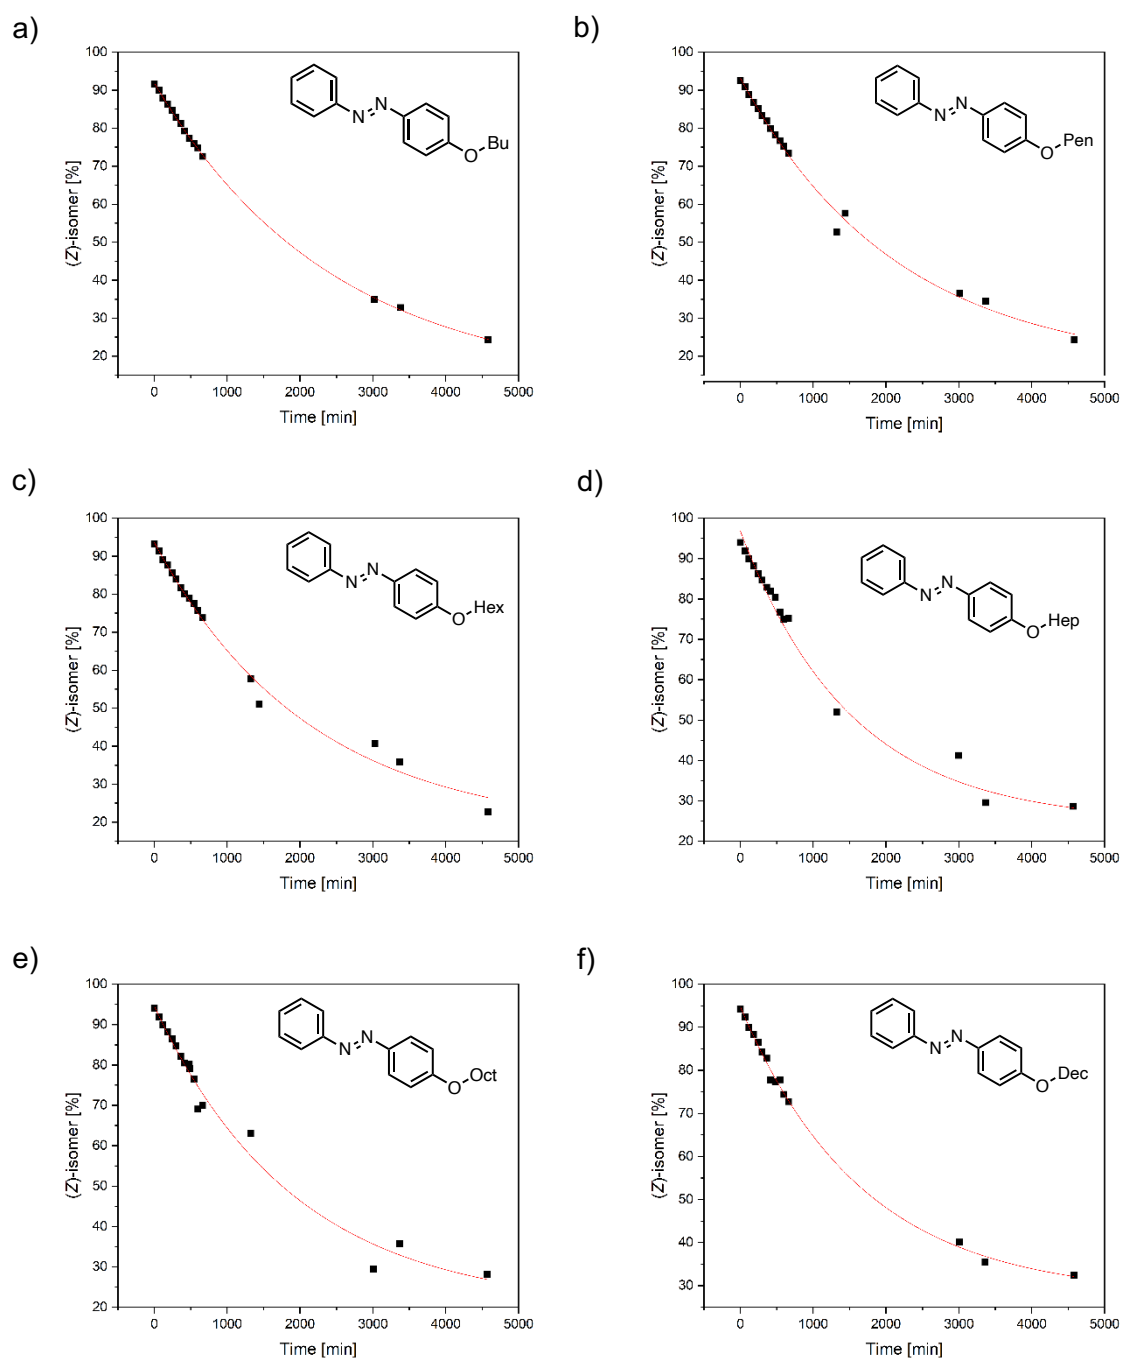

**Figure S12: Thermal half-lives of neat *p*-alkoxy-AB at rt.**

**Table 15: Thermal half-lives of neat *p*-alkoxy-AB's at rt.**

| Compound          | $k / 10^{-4} \text{ s}^{-1}$ | $\sigma k / 10^{-5} \text{ s}^{-1}$ | $t_{1/2} / \text{h}$ | $\sigma t_{1/2} / \text{h}$ |
|-------------------|------------------------------|-------------------------------------|----------------------|-----------------------------|
| <i>p</i> -OBu-AB  | 4.11                         | 1.0                                 | 28.1                 | 0.7                         |
| <i>p</i> -OPen-AB | 4.68                         | 4.4                                 | 24.7                 | 2.3                         |
| <i>p</i> -OMe-AB  | 4.68                         | 5,8                                 | 24.7                 | 3.1                         |
| <i>p</i> -OHep-AB | 6.59                         | 10.1                                | 17.5                 | 2.7                         |
| <i>p</i> -OOct-AB | 5.17                         | 8.4                                 | 22.3                 | 3.6                         |
| <i>p</i> -ODec-AB | 5.95                         | 3.8                                 | 19.4                 | 1.2                         |

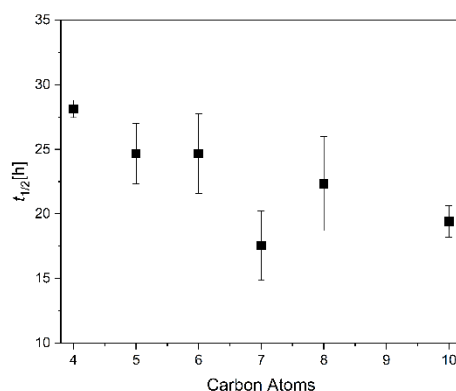

**Figure S13: Thermal half-lives of neat *p*-alkoxy-AB at rt.**

The change in the absorption spectrum of the neat compound during thermal relaxation was monitored by thin layer UV-Vis spectroscopy as described in section 6. UV-Vis spectroscopy. Therefore, *p*-OHex-AB was used as an example. The thin film was irradiated with 365 nm until the photostationary state was reached. The thermal isomerization was monitored in 60 min intervals at 25 °C for 40 h. The process of thermal isomerization is divided into two separate processes.

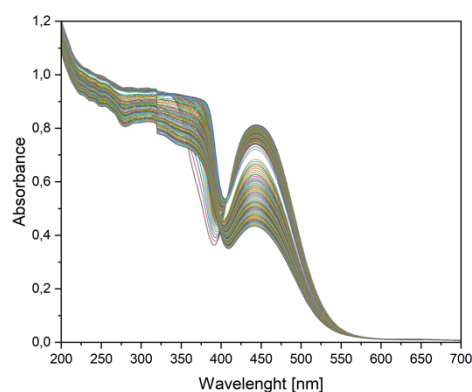

**Figure S14: UV-Vis absorption spectra of thermal isomerization of neat thin film of *p*-OHex-AB at rt after irradiation with 365 nm.**

The process of thermal isomerization was divided into two individual processes to demonstrate the change in the absorption spectrum. The first process is the thermal isomerization in the liquid phase, which is characterized by the presence of an isosbestic point. The second process involves a phase transition from liquid to solid, which causes the unusual changes in the absorption spectrum. To clarify the change in absorption at a wavelength of 365 nm and 448 nm, the change in absorbance at these wavelengths is graphically represented by the change in time.

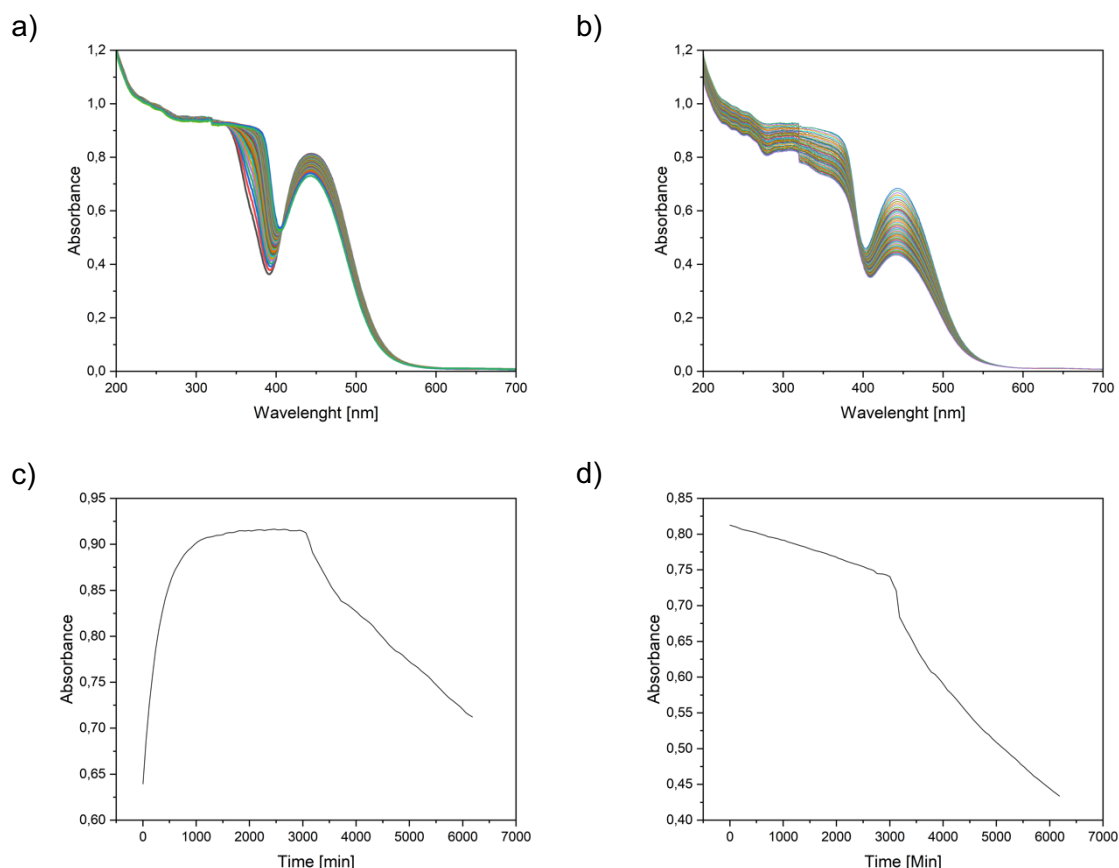

**Figure S15: Thermal isomerization of neat *p*-OHex-AB in a) liquid phase and b) phase transition to solid state. Change of the absorbance at c) 365 nm and d) 444 nm.**

## 10. Photoliquefaction *via* HPLC and PXRD

To evaluate the effectiveness of the photoisomerization *p*-OHex-AB was irradiated as an example as a thin powder layer on a glass slide according to the procedure for the preparation of thin layers of the compounds on a glass slide explained in section 5. Irradiation experiments (see Figure S2 a). The compound was irradiated with 365 nm and a distance of 10 cm or 5 cm at rt. The change in isomer composition was determined using HPLC. For this purpose, an aliquot of the irradiated sample was taken at different time intervals and dissolved in ACN in a 2 ml vial. It should be noted that during irradiation at the phase transition from the solid to the liquid phase, errors can occur when taking an aliquot, as the sample composition is not fully homogeneous during the photoliquefaction process.

**Table S16: Determination of the (*E*)-isomer content during irradiation of neat *p*-OHex-AB with 365 nm with a distance of the LED of 10 cm at rt detected *via* HPLC.**

| Time / min | ( <i>E</i> )-Isomer / % | Time / min | ( <i>E</i> )-Isomer / % | Time / min | ( <i>E</i> )-Isomer / % |
|------------|-------------------------|------------|-------------------------|------------|-------------------------|
| 0          | 100                     | 23         | 96.3                    | 88         | 83.4                    |
| 1          | 100                     | 28         | 97.0                    | 109        | 77.8                    |
| 3          | 99.8                    | 33         | 94.0                    | 129        | 72.2                    |
| 8          | 99.1                    | 43         | 92.8                    | 169        | 43.2                    |
| 13         | 98.5                    | 53         | 91.2                    | 209        | 21.6                    |
| 18         | 97.5                    | 68         | 86.8                    |            |                         |

**Table S17: Determination of the (*E*)-isomer content during irradiation of neat *p*-OHex-AB with 365 nm with a distance of the LED of 5 cm at rt detected *via* HPLC.**

| Time / min | ( <i>E</i> )-Isomer / % | Time / min | ( <i>E</i> )-Isomer / % | Time / min | ( <i>E</i> )-Isomer / % |
|------------|-------------------------|------------|-------------------------|------------|-------------------------|
| 0          | 100                     | 40         | 86.6                    | 80         | 71.5                    |
| 5          | 99.3                    | 45         | 83.1                    | 85         | 69.0                    |
| 10         | 95.3                    | 50         | 85.6                    | 90         | 66.1                    |
| 15         | 94.6                    | 55         | 83.0                    | 95         | 48.8                    |
| 20         | 92.3                    | 60         | 80.1                    | 100        | 45.6                    |
| 25         | 93.1                    | 65         | 78.2                    | 105        | 53.9                    |
| 30         | 86.1                    | 70         | 79.8                    | 110        | 24.2                    |
| 35         | 92.0                    | 75         | 65.4                    | 115        | 11.4                    |

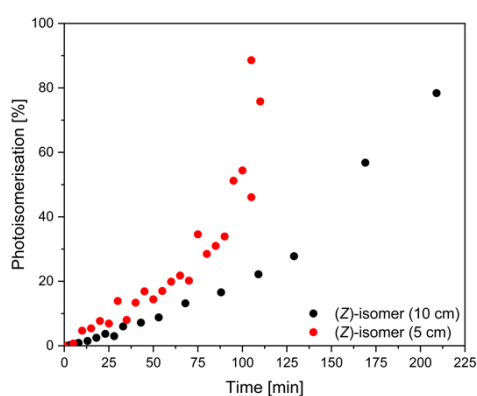

**Figure S16: Change of (*Z*)-isomer content during irradiation with 365 nm of neat *p*-OHex-AB at rt with a distance of the LED of 5 cm (red) and 10 cm (black).**

Powder XRD measurement was performed with the *p*-OHex-AB as an example to monitor the decreasing crystallinity during the phase transition from solid to liquid due to irradiation with a

wavelength of 365 nm. A thin layer of powder was irradiated at a distance of 15 cm from the LED at room temperature over a period of 90 min (see figure S17).

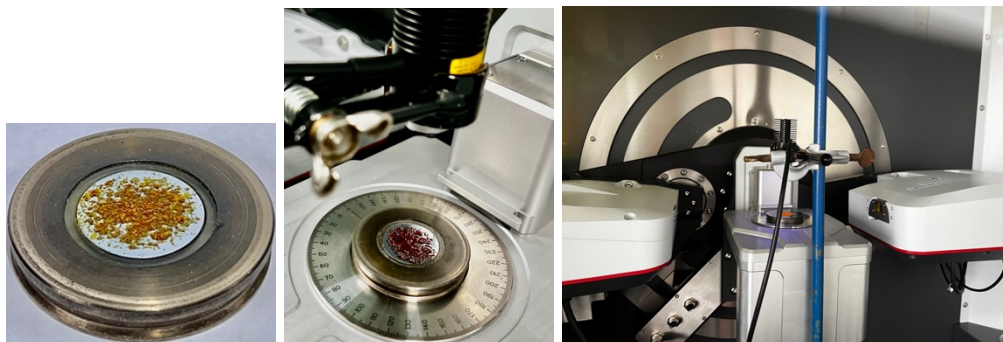

**Figure S17: Setup for powder XRD irradiation experiments.**

The photoliquefaction was monitored in 1 min intervals at rt for 90 min.

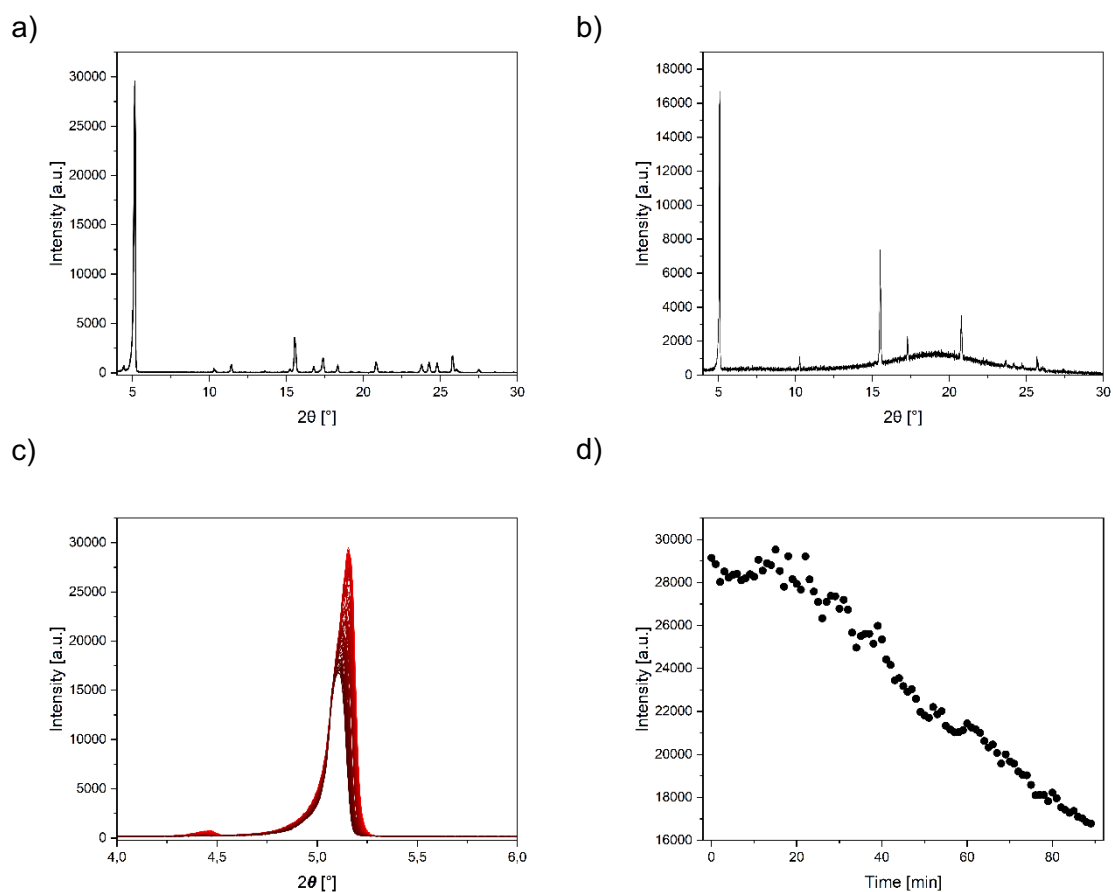

**Figure S18: PXRD a) before irradiation and b) after 90 min 365 nm. c) Changes in the PXRD spectrum over 90 min at 365 nm in a range of 4 - 6° 2θ. d) Plotting the decrease in maximum intensity against time.**

## 11. DSC measurements

To measure the energy storage capacity of a *p*-alkoxy-Azobenzenes, DSC curves were scanned on a DSC3+ STAR<sup>®</sup> system (METTER TOLEDO) at a heating rate of 10 °C/min under N<sub>2</sub> atmosphere. Approximately 5–8 mg of the sample was weighed and dissolved in 3 mL of acetonitrile (ACN). The solution was irradiated for 24 hours. The photoisomerization was detected via UV-Vis spectroscopy. Irradiation of the solution was continued until no further change in the UV-Vis spectra was observed. Once complete conversion was confirmed, the solvent was evaporated under continued irradiation at room temperature, and the remaining oil was weighed and transferred into a differential scanning calorimetry (DSC) pan. DSC analysis was then conducted on the known mass of the sample.

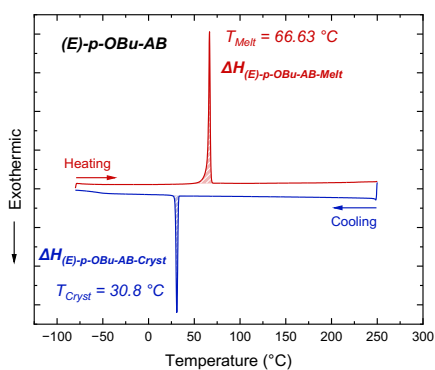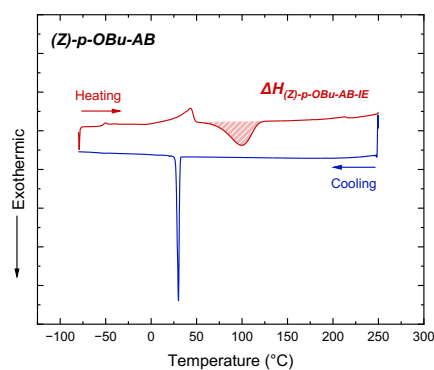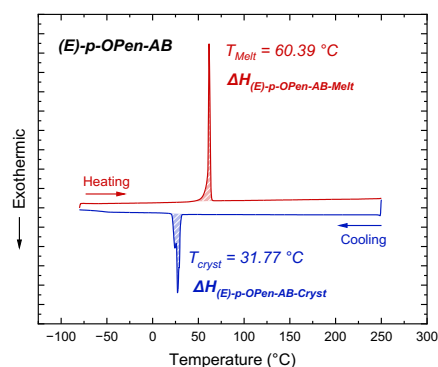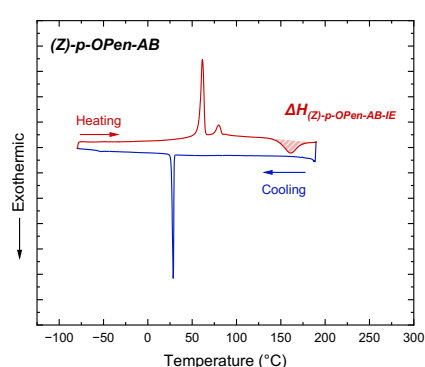

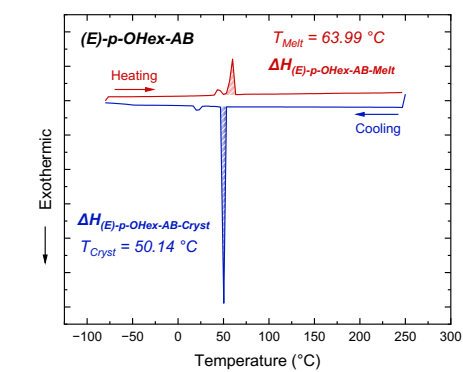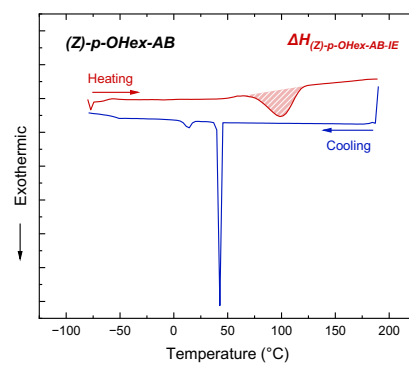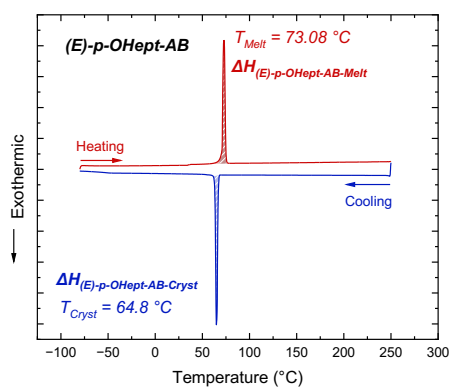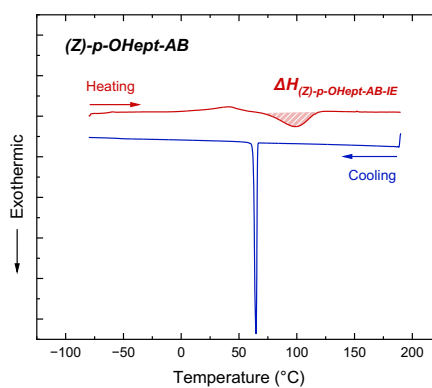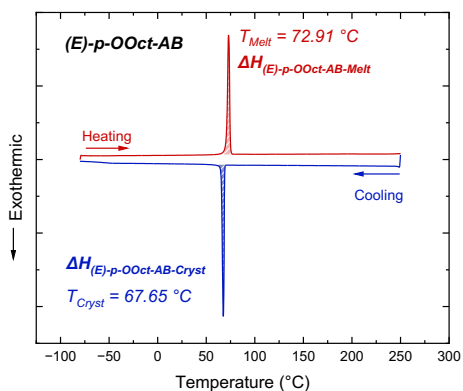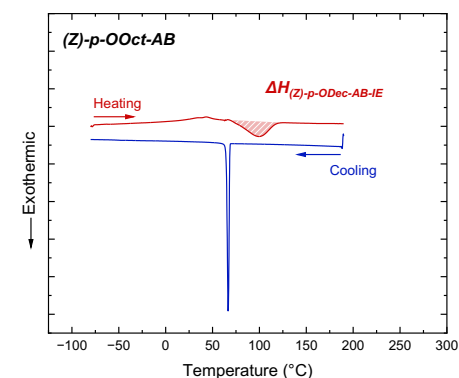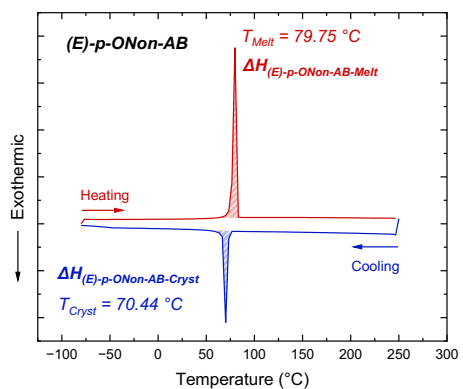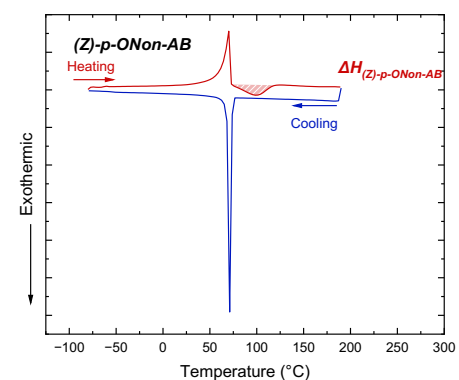

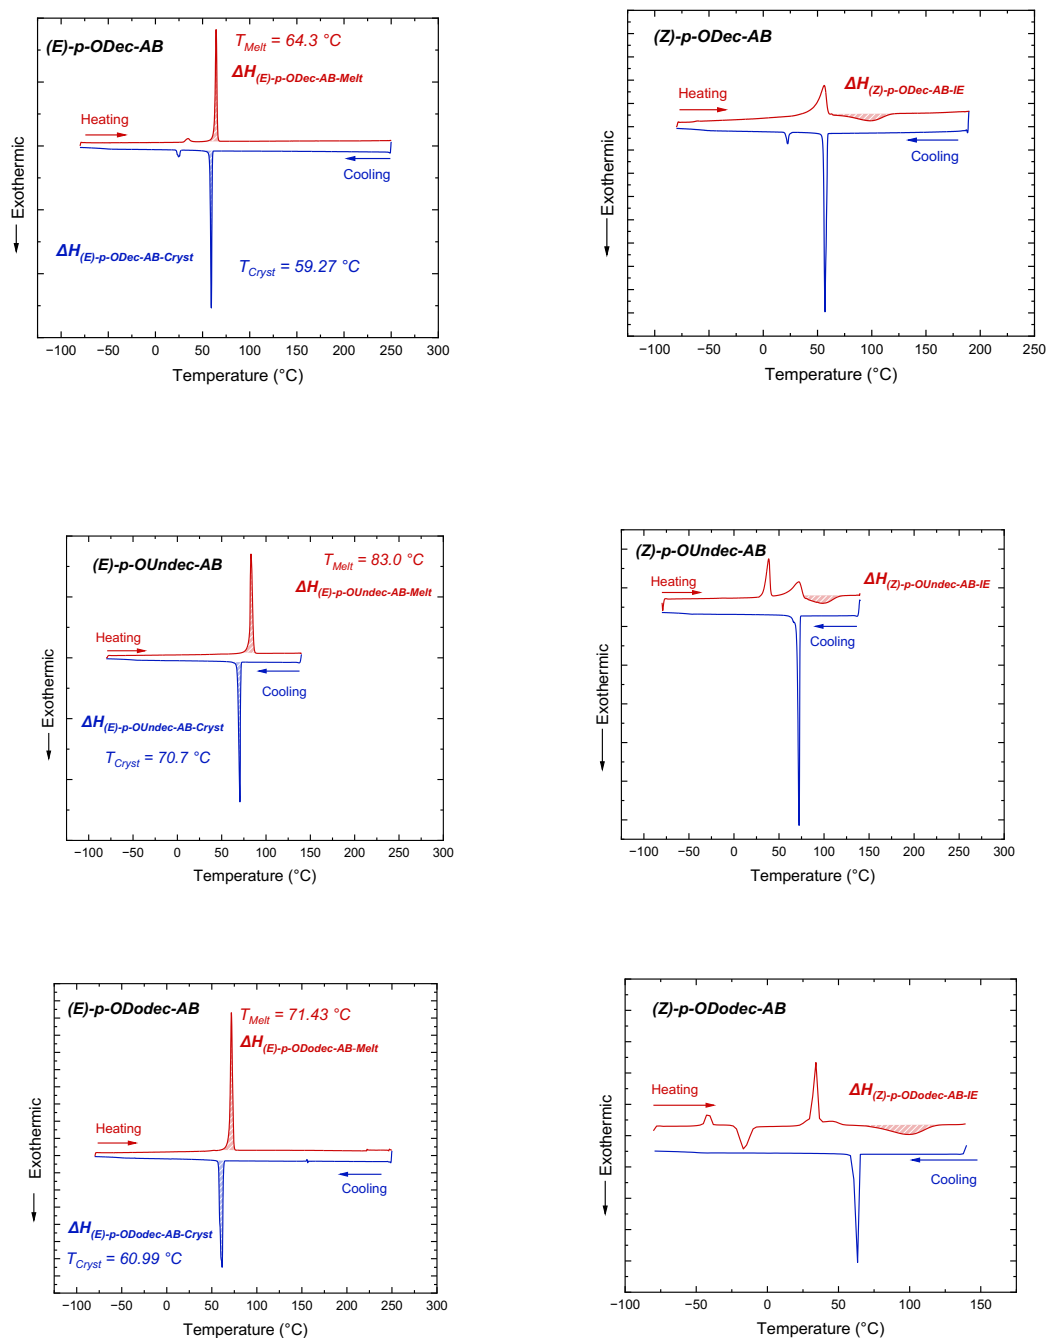

**Figure S19: DSC measurements of neat *p*-alkoxy-AB.**

The isomerization enthalpy was measured for PSS<sub>340</sub> in ACN. The previous determined composition at PSS<sub>340</sub> in ACN was used to calculate the potential energies for a conversion of 100% as well as for the measured PSS composition in the solid state PSS<sub>365</sub>.

$$\Delta H_{iso.;PSS_{365}} = \Delta H_{iso.;PSS_{340}} \cdot \frac{[(Z)_{PSS_{365}}]}{[(Z)_{PSS_{340}}]}$$

**Equation S4: Calculation of  $\Delta H_{iso.}$  at PSS<sub>365</sub>.**



$$\Delta H_{\text{iso.};100\%} = \Delta H_{\text{iso.};\text{PSS}_{340}} \cdot \frac{100\%}{[(Z)_{\text{PSS}_{340}}]}$$

**Equation S5: Calculation of  $\Delta H_{\text{iso.}}$  for 100% photoconversion.**

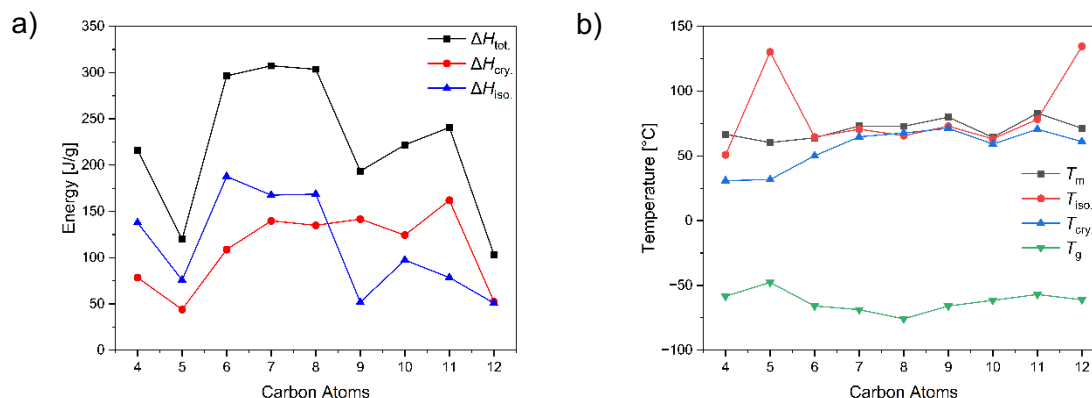

**Figure S20: a) measured  $\Delta H_{\text{cry.}}$  and  $\Delta H_{\text{iso.}}$  and  $\Delta H_{\text{tot.}}$  calculated for 100% conversion b) Melting ( $T_m$ ), crystallization ( $T_c$ ), glass ( $T_g$ ) and isomerization ( $T_i$ ) Temperatures for *p*-alkoxy-AB measured *via* DSC.**

**Table S18:  $\Delta H_{\text{iso}}$  measured at the PSS<sub>340</sub> and calculated for PSS<sub>365</sub> and for 100% conversion.**

| Compound            | (Z) [%]<br>at PSS <sub>340</sub> | $\Delta H_{\text{iso.}}$ [J/g]<br>at PSS <sub>340</sub> | (Z) [%]<br>at PSS <sub>365</sub> | $\Delta H_{\text{iso.}}$ [J/g]<br>at PSS <sub>365</sub> | $\Delta H_{\text{iso.}}$ [J/g]<br>for 100% |
|---------------------|----------------------------------|---------------------------------------------------------|----------------------------------|---------------------------------------------------------|--------------------------------------------|
| <i>p</i> -OBu-AB    | 76.9                             | 105.97                                                  | 91.6                             | 126.23                                                  | 137.80                                     |
| <i>p</i> -OPen-AB   | 77.1                             | 58.46                                                   | 92.8                             | 70.36                                                   | 75.82                                      |
| <i>p</i> -OHex-AB   | 76.9                             | 144.38                                                  | 93.3                             | 175.17                                                  | 187.75                                     |
| <i>p</i> -OHep-AB   | 74.5                             | 124.80                                                  | 93.3                             | 156.29                                                  | 167.52                                     |
| <i>p</i> -OOct-AB   | 74.7                             | 125.97                                                  | 93.8                             | 158.18                                                  | 168.63                                     |
| <i>p</i> -ONon-AB   | 73.6                             | 38.19                                                   | 92.7                             | 48.10                                                   | 51.89                                      |
| <i>p</i> -ODec-AB   | 72.7                             | 70.87                                                   | 94.5                             | 92.12                                                   | 97.48                                      |
| <i>p</i> -OUndec-AB | 73.0                             | 57.37                                                   | 93.5                             | 73.48                                                   | 78.59                                      |
| <i>p</i> -ODodec-AB | 73.3                             | 37.38                                                   | 94.4                             | 48.14                                                   | 51.00                                      |

**Table S19: Measured  $\Delta H_{\text{tot}}$  at the PSS<sub>340</sub> and calculated at PSS<sub>365</sub> and for 100% conversion.**

| Compound          | $\Delta H_{\text{cry.}}$ [J/g] | $\Delta H_{\text{tot.}}$ [J/g]<br>at PSS <sub>340</sub> | $\Delta H_{\text{tot.}}$ [J/g]<br>at PSS <sub>365</sub> | $\Delta H_{\text{tot.}}$ [J/g]<br>for 100% |
|-------------------|--------------------------------|---------------------------------------------------------|---------------------------------------------------------|--------------------------------------------|
| <i>p</i> -OBu-AB  | 78.49                          | 184.46                                                  | 204.72                                                  | 216.29                                     |
| <i>p</i> -OPen-AB | 44.06                          | 102.52                                                  | 114.42                                                  | 119.88                                     |
| <i>p</i> -OHex-AB | 108.80                         | 253.18                                                  | 283.97                                                  | 296.55                                     |
| <i>p</i> -OHep-AB | 139.90                         | 264.7                                                   | 296.19                                                  | 307.42                                     |

|                     |        |        |        |        |
|---------------------|--------|--------|--------|--------|
| <i>p</i> -OOct-AB   | 135.01 | 260.98 | 293.19 | 303.64 |
| <i>p</i> -ONon-AB   | 141.70 | 179.89 | 189.80 | 193.59 |
| <i>p</i> -ODec-AB   | 124.46 | 195.33 | 216.58 | 221.94 |
| <i>p</i> -OUndec-AB | 162.15 | 219.52 | 235.63 | 240.74 |
| <i>p</i> -ODodec-AB | 52.45  | 89.83  | 100.59 | 103.45 |

**Table S20: Melting ( $T_m$ ), crystallization ( $T_c$ ), glass ( $T_g$ ) and isomerization ( $T_i$ ) Temperatures for *p*-alkoxy-AB measured via DSC.**

| Compound            | (E)-isomer |            | (Z)-isomer |            |
|---------------------|------------|------------|------------|------------|
|                     | $T_m$ [°C] | $T_c$ [°C] | $T_g$ [°C] | $T_i$ [°C] |
| <i>p</i> -OBu-AB    | 66.63      | 30.80      | -58.33     | 50.82      |
| <i>p</i> -OPen-AB   | 60.39      | 31.77      | -47.66     | 130.32     |
| <i>p</i> -OHex-AB   | 63.99      | 50.14      | -65.83     | 64.49      |
| <i>p</i> -OHep-AB   | 73.08      | 64.80      | -68.66     | 70.66      |
| <i>p</i> -OOct-AB   | 72.91      | 67.65      | -75.83     | 65.65      |
| <i>p</i> -ONon-AB   | 80.00      | 71.27      | -65.83     | 72.99      |
| <i>p</i> -ODec-AB   | 64.30      | 59.27      | -61.51     | 63.13      |
| <i>p</i> -OUndec-AB | 83.01      | 70.65      | -56.98     | 78.32      |
| <i>p</i> -ODodec-AB | 71.43      | 60.99      | -61.04     | 134.66     |

## 12. References

- (1) Chen, P.-Y.; Hsu, C.-W.; Ho, T.-I.; Ho, J.-H. *RSC Adv.* **2021**, *11*, 6662–6666.
- (2) Fei, L.; Yin, Y.; Zhang, J.; Wang, C. *Solar RRL* **2020**, *4*, 105.
- (3) Yang, Q.; Ge, J.; Qin, M.; Wang, H.; Yang, X.; Zhou, X.; Zhang, B.; Feng, Y.; Feng, W. *Sci. China Mater.* **2023**, *66*, 3609–3620.
- (4) Chi, H.; Mya, K. Y.; Lin, T.; He, C.; Wang, F.; Chin, W. S. *New J. Chem.* **2013**, *37*, 735.
- (5) Hashimoto, T.; Yamazaki, M.; Ishii, H.; Yamada, T.; Hayashita, T. *Chem. Lett.* **2014**, *43*, 228–230.
- (6) Harbron, E. J.; Vicente, D. A.; Hoyt, M. T. *J. Phys. Chem. B.* **2004**, *108*, 18789–18792.
- (7) Akiyama, H.; Tamada, K.; Nagasawa, J. I.; Abe, K.; Tamaki, T. *J. Phys. Chem. B.* **2003**, *107*, 130–135.
